# Supplementary material for: Fast sequence alignment for centromeres with RaMA
Source: HighWire-hosted journal article supplement (doi:10.1101/gr.279763.124), 2025-02-12
Supplement: Supplemental_Material.pdf [file Supplemental_Material.pdf]

## Supplemental Material for

### Fast sequence alignment for centromere with RaMA

Pinglu Zhang<sup>1,2</sup>, Yanming Wei<sup>2,3</sup>, Qinzhong Tian<sup>1,2</sup>, Quan Zou<sup>1,2</sup>, Yansu Wang<sup>1,2,\*</sup>

1. Institute of Fundamental and Frontier Sciences, University of Electronic Science and Technology of China, Chengdu, China
2. Yangtze Delta Region Institute (Quzhou), University of Electronic Science and Technology of China, Quzhou, China
3. School of Computer Science and Technology, Xidian University, Xi'an, Shaanxi, China

\*Corresponding author: [wangyansu@uestc.edu.cn](mailto:wangyansu@uestc.edu.cn)

## Supplemental Method

### Parameter Settings for Different Alignment Methods

We utilized four methods—minimap2 [1], wavefront alignment (WFA) [2], UniAligner [3], and RaMA—to align the centromere sequences. Below, we provide a detailed explanation of the parameter settings for each method.

For the first method minimap2 (git commit hash 0cc3cdca27f050fb80a19c90d25ecc6ab0b0907b), which is available at <https://github.com/lh3/minimap2>, we selected the same parameter settings used in previous studies:

```
minimap2 -a -I 15G -K 8G -t thread_num -ax asm20 --secondary=no --eqx -s 2500  
ref.fasta query.fasta > output.sam
```

The authors of previous study[4] selected specific minimap2 parameters to optimize alignment for repetitive and structurally divergent regions in diploid human genomes. They used `-I 15G` for additional memory and `-K 8G` to allow loading 8 Gb of sequence at once, accommodating the full genome and preventing alignment bottlenecks. The `-ax asm20` option was chosen to align sequences with up to 20% divergence, suitable for variable  $\alpha$ -satellite HOR structures. They used `--secondary=no` to prevent multi-mapping, ensuring each query aligns only once, and `--eqx` to parse CIGAR strings for calculating mean sequence identity. Finally,

they set ``-s 2500`` as the minimal alignment score to avoid spurious alignments while retaining accurate centromere alignments, following tests of various values. After obtaining the SAM alignment results, we used the following samtools[5] command to retain only the primary alignments:

```
samtools view -h -F 256 -F 2048 output.sam -o output_primary.sam
```

The wavefront alignment algorithm (git commit hash `cf3eb92dd0aa9bf067d5488a606d8c91173e74eb`), which is available at <https://github.com/smarco/WFA2-lib>, is a recently proposed tool for pairwise sequence alignment that operates in  $O(ns)$  time, where  $n$  is the read length and  $s$  is the alignment score. By leveraging homologous regions between sequences, it accelerates the alignment process, making it significantly faster than traditional dynamic programming methods, particularly for long and noisy reads. We used a 2-piece affine gap cost with the following scoring settings: match = 0, mismatch = 3, gap\_open1 = 4, gap\_extension1 = 2, gap\_open2 = 12, and gap\_extension2 = 1, aiming to minimize the total score. Here, gap\_open1 and gap\_extension1 are the penalties for short gaps, while gap\_open2 and gap\_extension2 are the penalties for long gaps. WFA is a deterministic algorithm, and we did not employ any optimization strategies, ensuring that the solution obtained is the optimal solution of dynamic programming. In practical use, since RaMA incorporates WFA, we configured RaMA to bypass anchor finding and directly use WFA for centromere alignment, obtaining the WFA results directly.

For wfmask [6], we performed the alignment using its default parameters, with the following command:

```
wfmask ref.fasta query.fasta > output.paf
```

For UniAligner [3], a parameter-free sequence alignment framework, we used the default settings. The alignment command is as follows:

```
tandem_aligner --first first.fasta --second second.fasta -o output_dir
```

The code for UniAligner can be found at <https://github.com/seryrzu/unialigner>, with the git commit hash `c5a1eecab7bd17485a0fe3422684409c3e884f31`.

Finally, for our work RaMA, the source code is available at

<https://github.com/malabz/RaMA>, with the used version's git commit hash being 8661cde3ea0e0a4bc22d850c17321878e28f6948. RaMA was run with default parameters, using the following alignment command:

```
RaMA -r /path/to/ref.fasta -q /path/to/query.fasta -o /path/to/output_dir
```

When invoking WFA [2], RaMA used the same 2-piece affine gap cost with the following parameters: match = 0, mismatch = 3, gap open1 = 4, gap extension1 = 2, gap open2 = 12, and gap extension2 = 1, with the aim of minimizing the total score. In this scheme, gap open1 and gap extension1 are the penalties for short gaps, while gap open2 and gap extension2 are the penalties for long gaps.

### **Creating Simulated Data with Regions Removed from Template**

To demonstrate the capability of different methods in capturing the genetic evolution of centromeres, we generated a set of simulated data. We used the X chromosome centromere of CHM13 as the template. The X chromosome sequence of CHM13 can be obtained from [https://s3-us-west-2.amazonaws.com/human-pangenomics/T2T/CHM13/assemblies/analysis\\_set/chm13v2.0.fa.gz](https://s3-us-west-2.amazonaws.com/human-pangenomics/T2T/CHM13/assemblies/analysis_set/chm13v2.0.fa.gz), with the centromere located at positions 57,819,763 to 60,927,195. To extract the centromere region of the X chromosome, we used the following command:

```
samtools faidx chm13v2.0.fa chrX:57819763-60927195 > chrX_cen.fa
```

Next, we used HORmon to annotate the extracted centromere sequence. HORmon requires monomers as a basis for annotation, which can be inferred using HORmon's built-in monomer inference program:

```
monomer_inference -seq chrX_cen.fa -mon test_data/AlphaSat.fa -o chrX
```

We directly use the monomers inferred in the HORmon[7], which can be obtained from <https://figshare.com/articles/dataset/HORmon/16755097/2>. To start the annotation, we use the following command:

```
HORmon --seq chrX_cen.fa --mon cenX_monomers.fa --cen-id X -o chrX_res -t 12
```

The final HOR annotation results are recorded in the `HORdecomposition.tsv` file located in the `chrX\_res` folder. We selected two regions: 182368-547935 as

Region 1, and 2417322-2773488 as Region 2. These regions each represent complete HOR blocks. By removing these two regions, we obtained two sequences for the simulated dataset. Therefore, the correct alignment CIGAR result for these two sequences is `182368=365568I1869390=356167D333939=`.

### **Generating Non-Repetitive Sequences of Different Similarities Using INDELible**

In our study, we simulated non-repetitive sequences with varying levels of similarity using INDELible [8]. A script was developed to generate sequences with similarity ranges from 70% to 99%, with divergence times corresponding to each similarity level. The control files for INDELible were configured using the TVM nucleotide substitution model, specified state frequencies, insertion and deletion rates, and a Lavalette indel length distribution. Specifically, the substitution model parameters were set as  $b=0.01$ ,  $c=0.01$ ,  $d=0.04$ ,  $e=0.04$ , and  $a=f=1$ , with state frequencies of  $T=0.25$ ,  $C=0.31$ ,  $A=0.31$ , and  $G=0.13$ . Rate parameters included  $\text{pinv}=0.84$ ,  $\alpha=1.03$ , and  $\text{ngamcat}=4$ . The indel model used a Lavalette distribution with  $a=5$  and  $M=50$ , with an insertion rate of 0.01 and a deletion rate of 0.1 relative to a substitution rate of 1. Each sequence was simulated to a length of 1,000,000 nucleotides. This simulation approach generated a robust dataset to evaluate alignment methods, covering a broad spectrum of sequence similarities.

### **Generating Hybrid Sequence of Tandem Repeats and Non-Tandem Repeats**

To explore the performance of RaMA on tandem repeat and non-tandem repeat sequences, we used INDELible to simulate two non-repetitive sequences of 1,000,000 in length with 95% similarity, and then inserted the centromeres from chromosomes 16 and 20 of CHM13 and CHM1 into them. For the parameters used in INDELible, please refer to the section 'Generating Non-Repetitive Sequences of Different Similarities Using INDELible'. We inserted the centromeres from chromosomes 16 and 20 of CHM13 and CHM1 at positions 300,000 and 800,000,

respectively. The insertion of these two centromeres divided the entire sequence into five segments. The positions and lengths of these five segments in the two sequences are shown in the Table S6. Segment 1 spans 0–300000 in Seq1 and 0–299983 in Seq2. Centromere 1 covers 300000–1938824 in Seq1 and 299983–1868018 in Seq2. Segment 2 runs from 2238824–2738824 in Seq1 and 2168001–2668036 in Seq2. Centromere 2 extends from 2738824–4912627 in Seq1 and 2668036–5431726 in Seq2. Segment 3 spans 4912627–5106497 in Seq1 and 5431726–5625639 in Seq2.

### **Comparison of RaMA and Other Methods on Non-Repetitive Sequences**

One significant limitation of UniAligner is its suitability only for repetitive sequences, as it does not align the remaining regions after rare-alignment. RaMA addresses this issue by aligning these regions as well. We generated simulated datasets of 1,000,000 bp with sequence similarities ranging from 75% to 99% using INDELible [8] (see Supplemental Method). Alignments were performed using RaMA, UniAligner, and WFA, with affine gap penalties set for WFA (match = 0, mismatch = 2, gap open = 3, gap extension = 1). Q scores of the alignment results are shown in Fig S10. When sequence similarity is low, WFA provides the highest alignment quality, followed by RaMA, with UniAligner performing the worst. As similarity exceeds 83%, RaMA's alignment quality becomes consistent with or surpasses WFA. UniAligner consistently underperforms across all similarity levels. Notably, at 90% similarity, the Q scores of all methods approach 1, likely due to favorable sequence characteristics. These findings suggest RaMA excels in aligning non-repetitive sequences with moderate to high similarity, while UniAligner does not.

We investigated UniAligner's poor alignment quality on non-repetitive sequences by selecting sequences with 80% similarity, where the quality difference was most pronounced. We analyzed the gaps and mismatches in the alignment results. As shown in Fig S11, WFA's gaps and mismatches closely match

the true alignment, whereas UniAligner shows significantly more gaps and fewer mismatches. This discrepancy arises from UniAligner's alignment algorithm: it aligns indel-runs between anchor points, resulting in mismatches if the lengths are equal, and producing deletion-runs and insertion-runs, leading to many gaps if the lengths are unequal.

We further investigated the behavior of sparse match anchors across different sequence similarity levels. The simulated sequences had a length of 1 million base pairs. The relationship between sequence similarity and both the number of sparse match anchors, as well as the total length of these anchors, is presented in Fig S12 and Fig S13. Interestingly, as shown in Fig S12 and Fig S13, for non-repetitive sequences, the number of anchors and the total length of anchors exhibit opposite trends. We define anchor coverage as the ratio of the total anchor length to the total sequence length. The variation in anchor coverage with respect to sequence similarity is shown in Fig S14. We also performed alignments for each chromosome's centromere using RaMA, with CHM13 as the reference and CHM1 as the query. The number of anchors, total anchor length, and anchor coverage are summarized in Table S7. Across the centromeres of 23 chromosomes, the average coverage is 32%, with a maximum of 76% on chromosome 19. In contrast, the minimum coverage for non-repetitive sequences at 70% similarity is 88%. This indicates that rare match anchors are significantly fewer in tandem repeat sequences compared to non-repetitive sequences.

### **Comparison of RaMA and Other Methods on Hybrid Sequences**

In chromosomes, extra tandem repeat sequences often appear interspersed with non-tandem repeat sequences. WFA enables RaMA to handle long sequence alignments effectively. Therefore, in this section, we explore the performance of RaMA and UniAligner on hybrid sequences. We used RaMA and UniAligner to align hybrid sequences, and their alignment paths are shown in Fig S15. As shown in the Fig S15, both methods demonstrate strong boundary distinction capabilities for

the regions. For a given region pair, the match bases refer to the number of bases in the query region that align to the reference in the alignment result. Coverage is defined as the ratio of match bases to the length of the reference. We present the alignment coverage of RaMA and UniAligner for the five regions in the Table S8. The results show that RaMA achieves slightly higher alignment quality than UniAligner across all five regions. This experiment demonstrates RaMA's potential for accurately aligning hybrid sequences. In conclusion, although this experiment does not fully showcase RaMA's performance on hybrid sequences, it offers valuable insights into RaMA's potential for accurate alignment of these sequences.

### **Linear Range Minimum Query Strategy**

To accelerate the range minimum query on the LCP array, we employed a linear range minimum query algorithm based on block sparse table. In this section, we provide a detailed explanation of this algorithm. For range minimum queries, the sparse table [9] is a widely used algorithm, with a time complexity of  $O(n \log n)$  for its construction. However, this can be relatively slow compared to the  $O(n)$  complexity of directly building an enhanced suffix array [10]. Therefore, we aim to improve the sparse table to achieve  $O(n)$  construction time as well. A simple and straightforward approach is to divide the sequence into blocks of length  $\log n$ , and use a sparse table to manage the minimum value of each block. This reduces the construction time of the sparse table to  $O(n)$ . Of course, this alone is insufficient, as it only allows queries at the block level. To address this, additional auxiliary data structures are needed to fully refine this approach.

For query crossing multiple blocks, we utilize two auxiliary arrays: the prefix minimum (Pre) and suffix minimum (Sub). The prefix minimum for each element stores the minimum value from the start of the block up to that element, while the suffix minimum stores the minimum from the element to the end of the block. These allow us to handle any intra-block query efficiently by simply looking up the precomputed values in  $O(1)$  time. So when the query range spans across

multiple blocks, as shown in Fig S16, the strategy involves dividing the query into three parts: the portion within the starting block, handled by the suffix minimum; the portion within the ending block, handled by the prefix minimum; and the portion spanning entire blocks, managed by the sparse table. The result is the minimum of these three values, ensuring that cross-block queries are answered efficiently in constant time after preprocessing.

To handle query within one block efficiently, we use a monotonic stack combined with state compression, as shown in the example from Fig S16. In this example, we are working with the array  $A = [3, 2, 5, 4, 7]$  and performing a query to find the minimum value in the range  $[l_2 = 1, r_2 = 2]$  within the same block. We use a monotonic stack to track the minimum values. we precompute an  $F$  array, where  $F[i]$  stores the minimum value from  $A[0]$  to  $A[i]$  using a monotonic stack. As we traverse the block, starting with  $A[1] = 2$ , it is pushed onto the stack because it is smaller than  $A[0] = 3$ , which was previously on top. Larger elements, like  $A[0] = 3$ , are popped out. The remaining elements are all larger than 2, so they are not pushed onto the stack. To further optimize, we use state compression by encoding the stack's status into a bitmask. This means we can store the entire monotonic stack using just a 64-bit integer. Naturally, this also implies that the length of each block cannot exceed 64, and the length of array  $A$  cannot exceed 264. For example, after processing  $A[0,2]$ , the bitmask  $F[2] = 0b000010$  indicates that only  $A[1] = 2$  remains in the stack at this point. To efficiently perform the query for  $[1,2]$ , we right-shift the bitmask by 1 bit (since  $l_2=1$ ), resulting in  $0b000001$ . We then find the position of the first '1' in the shifted bitmask, which corresponds to the index of the minimum value within the queried range. In this case, the first '1' appears at position 0, meaning the minimum value is at index  $1+0=1$ . Thus, the minimum value in the range  $[1,2]$  is  $A[1] = 2$ . This process allows us to find the minimum value in constant time  $O(1)$ , leveraging both the monotonic stack and efficient bitwise operations.

In the construction process of the algorithm, four key arrays are involved: the



prefix minimum array  $Pre$ , the suffix minimum array  $Sub$ , the sparse table  $S$ , and the compressed state array  $F$ . Both  $Pre$  and  $Sub$  store the prefix and suffix minimum values within each block, and they are computed in  $O(n)$  time through a single linear pass over the array, with each requiring  $O(n)$  space. The sparse table  $S$  is built for efficient cross-block queries, which takes  $O(n)$  time for preprocessing as it operates on the block-level minimums and stores results in  $O(n)$  space. The compressed state array  $F$  represents the status of the monotonic stack within each block and allows intra-block queries to be resolved in constant time using bitwise operations. Constructing  $F$  involves a linear scan, giving it a time complexity of  $O(n)$  and requiring only  $O(n)$  space. Therefore, considering the construction of all these arrays involves only linear operations relative to the size of the input, the total time complexity of the algorithm is  $O(n)$ , and the space complexity remains  $O(n)$  as well. In the next section, "Construction of the Enhanced Suffix Array for Subsequences," we experimentally demonstrate that the constant factor in the construction process of this algorithm is smaller than that of the suffix array construction algorithm.

### **Construction of the Enhanced Suffix Array for Subsequences**

RaMA identifies rare matches through a recursive process. Initially, an enhanced suffix array is constructed for the two input sequences, and the LCP array is used to efficiently locate rare matches. These rare matches are then used to partition the sequences into subsequences, which undergo the same process iteratively until no further rare matches are found. Thus, a key challenge in algorithm optimization lies in how to quickly construct the enhanced suffix array for the subsequences. The most straightforward approach is to directly construct the enhanced suffix array for each subsequence, as done in UniAligner [3]. In practice, with the suffix array of the original sequence, we can efficiently construct the suffix array for subsequences in a single pass using the Inverse Suffix Array (ISA). To construct the suffix array for a subsequence using the Inverse Suffix Array

(ISA), we leverage the fact that the ISA maps the position of a suffix in the original sequence to its rank in the suffix array. For a subsequence, we can use the ISA of the original sequence to quickly determine the rank of each suffix within the subsequence. Specifically, for each suffix in the subsequence, we find its rank in the original sequence using the ISA. By sorting these ranks, we effectively build the suffix array for the subsequence. This approach is efficient because it avoids the need to recompute the suffix array from scratch, instead utilizing the existing structure of the original sequence's ISA.

To construct the LCP array, each LCP value requires a range minimum query (RMQ) on the original LCP sequence. Notably, both the construction of the suffix array using the ISA and the RMQ-based LCP array construction can be parallelized using multithreading to enhance performance. We implemented both the sparse table [9] and the block sparse table and compared their construction times with that of the enhanced suffix array [10]. We performed tests on data sizes ranging from 1 million to 20 million, measuring the construction time ten times for each size and taking the average. The results are presented in the Fig S17, it can be seen that the construction time of the enhanced suffix array is slightly faster than that of the sparse table, while the block sparse table is significantly faster than the enhanced suffix array. For instance, when the data size reaches 20 million, the construction time for the sparse table is 10.5 seconds, the enhanced suffix array takes 9.7 seconds, and the block sparse table finishes in just 2.16 seconds. This demonstrates that the constant factor for the block sparse table is much smaller than that of the enhanced suffix array.

Using the same settings, we also compared the query times of the sparse table and block sparse table across different data sizes with the construction time of the enhanced suffix array. The results are shown in the Fig S18. For example, when the data size is 20 million, the query times for the sparse table and block sparse table are similar, at 5.34 seconds and 5.15 seconds, respectively, both significantly faster than the 9.74 seconds required to construct the enhanced suffix array for a

sequence of the same length. A key advantage of querying, compared to the construction of the enhanced suffix array, is that it can be parallelized, whereas the latter cannot. Using a data size of 10 million as an example, the Fig S19 shows how the total query time changes as the number of threads increases. It clearly demonstrates that multithreading significantly optimizes the querying process.

In RaMA, the process recursively searches for rare matches to split the sequences, followed by constructing enhanced suffix arrays for the subsequences. However, the length of the subsequences requiring an enhanced suffix array is unpredictable, as the same segment may be processed multiple times. To analyze this, we used RaMA to compare the centromeres of different chromosomes from CHM13 and CHM1, recording the ratio of subsequence length to the original sequence length. The results, shown in the Fig S20, indicate that the average ratio is 1.7. We used the 1.7 ratio to compare the time required by three different strategies for constructing the enhanced suffix array for subsequences. For an input size of  $N$ , all three strategies involve constructing the enhanced suffix array for a sequence of length  $N$ . In the subsequent steps, an enhanced suffix array needs to be constructed for a subsequence of length  $1.7N$ . The three strategies are as follows: (1) Strategy 1 directly constructs the suffix array for the subsequence. (2) Strategy 2 constructs the block sparse table for the input data of size  $N$ , performs  $1.7N$  queries to build the LCP array, and uses the ISA to quickly obtain the suffix array for the subsequence. (3) Strategy 3 is the same as Strategy 2 but utilizes 16 threads to parallelize the queries. The results are shown in the Fig S21. As observed, the single-threaded block sparse table strategy is slightly faster than the direct construction of the enhanced suffix array, while the parallelized block sparse table strategy is significantly faster than both. The speed of strategy 3 is approximately twice that of strategy 1. This indicates that the block sparse table optimization effectively utilizes modern processors to accelerate the search for rare matches.

## Supplemental Figures

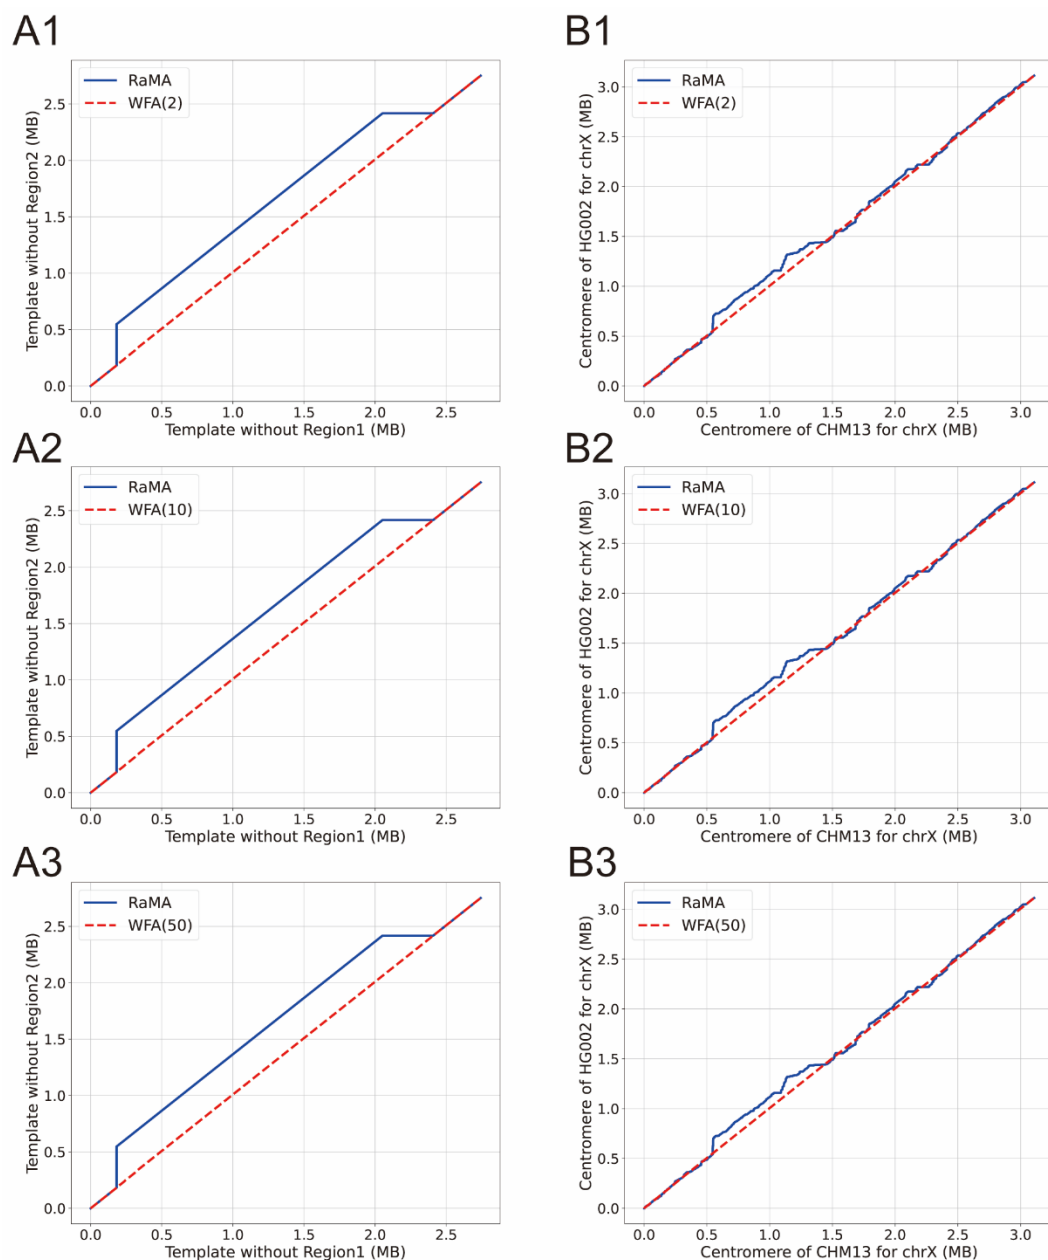

**Fig S1 Comparison of alignment paths between RaMA and other methods on real and simulated centromere sequences. Series A uses a template with region1 removed as the reference and a template with region2 removed as the query. Series B shows the X chromosome centromere of CHM13 as the reference and HG002 as the query. Labels 1, 2, and 3 correspond to RaMA compared with different parameters for WFA. The WFA penalty settings are configured as follows: the match penalty is set to 0, mismatch penalty to 4, short insertion opening penalty to 6, and long insertion opening penalty to 12. The extension penalty for long insertions is 1, while the extension penalties for short insertions labeled as 1, 2, and 3 are 2, 10, and 50, respectively.**

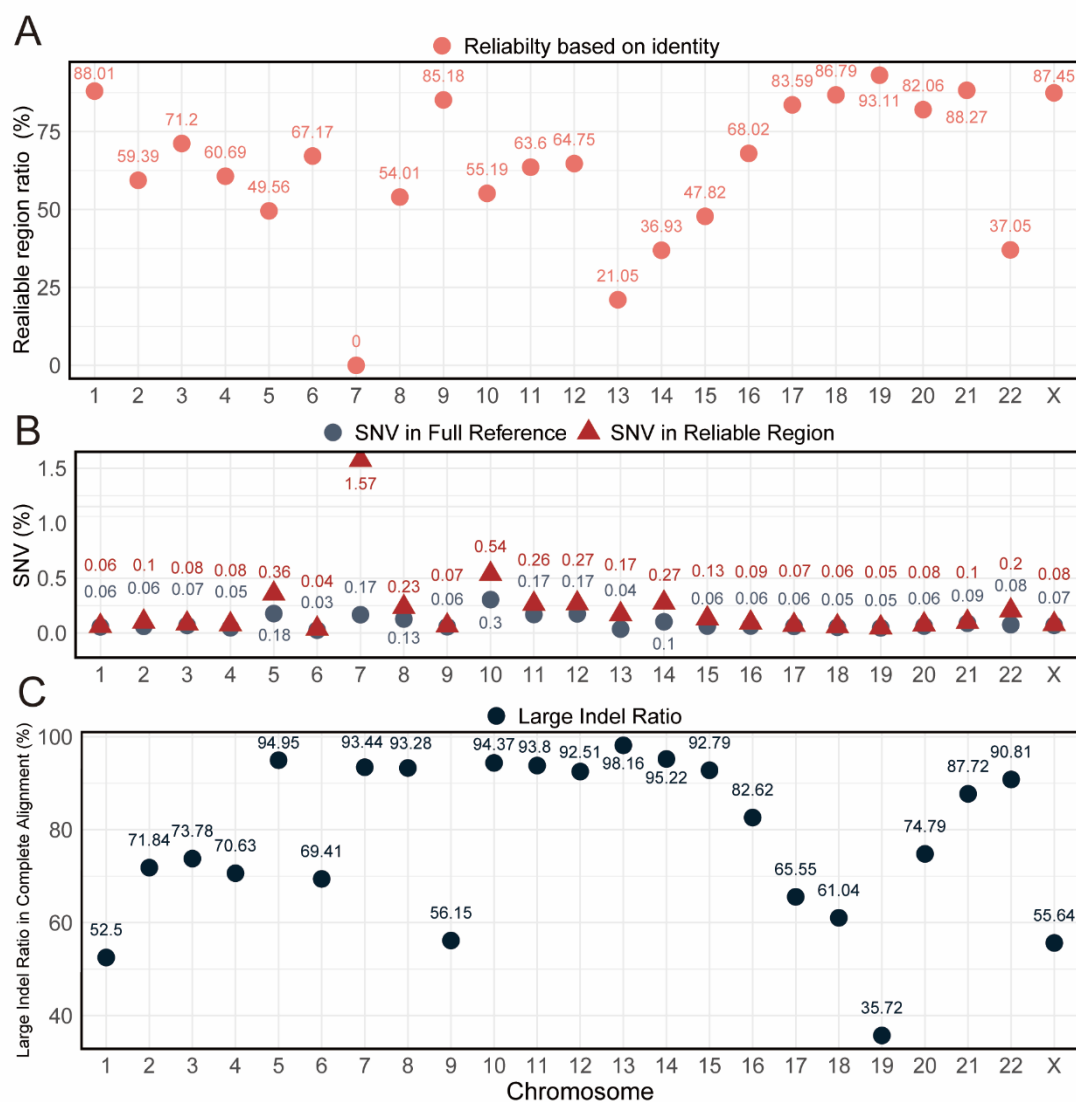

**Fig S2 Statistical analysis of centromere alignment results between CHM13 and CHM1 using UniAligner.**  
**(A)** Proportion of identity-based reliable regions across different chromosomes relative to the reference sequence length. **(B)** Comparison of the single nucleotide variant (SNV) rates between the entire reference sequence region and identity-based reliable regions. **(C)** Proportion of large indels across the complete reference sequence region.

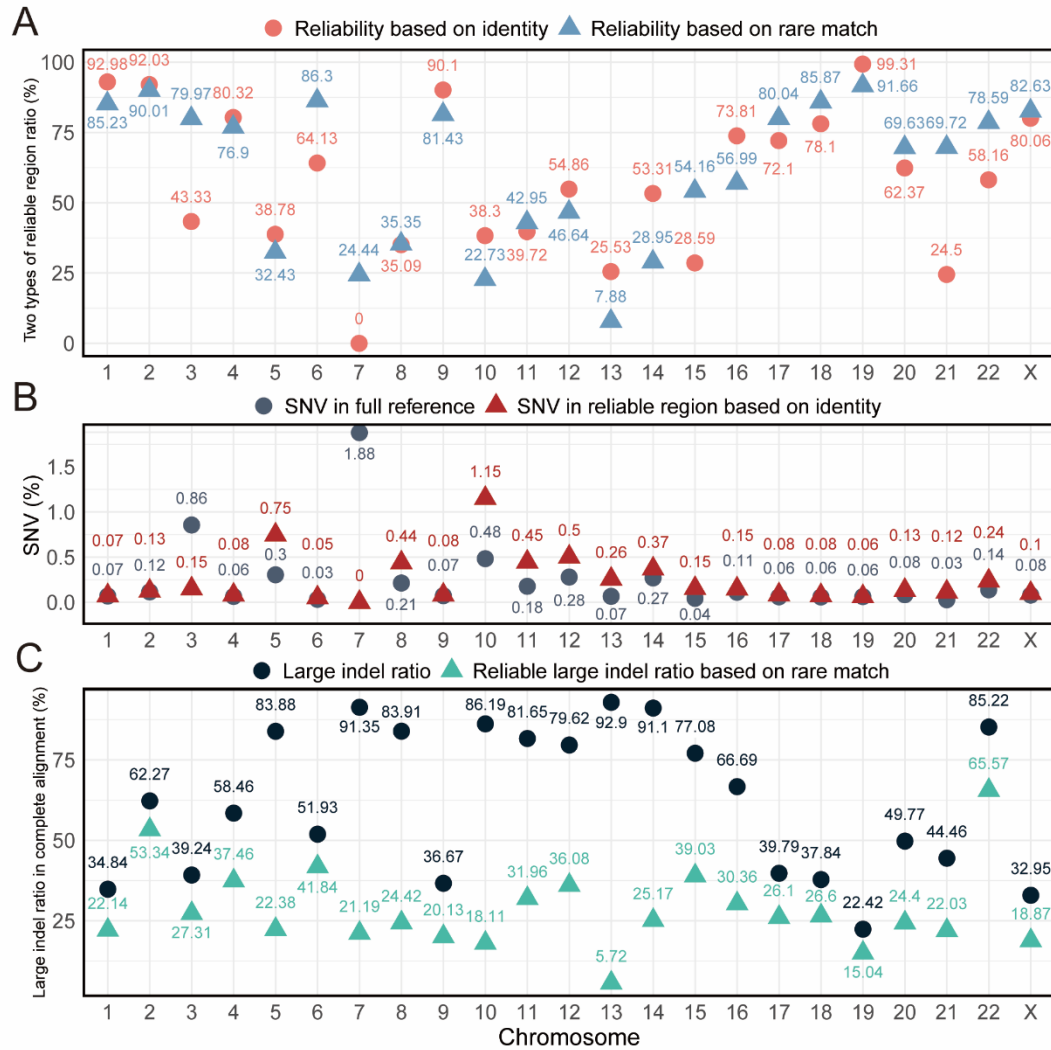

**Fig S3 Statistical analysis of centromere alignment results between CHM1 and CHM13 using RaMA. (A)** Proportion of two types of reliable regions, based on identity and rare matches, across different chromosomes relative to the reference sequence length. **(B)** Comparison of the single nucleotide variant (SNV) rates between the entire reference sequence region and identity-based reliable regions. **(C)** Proportion of large indels across the complete reference sequence region versus within rare-match-based reliable regions.

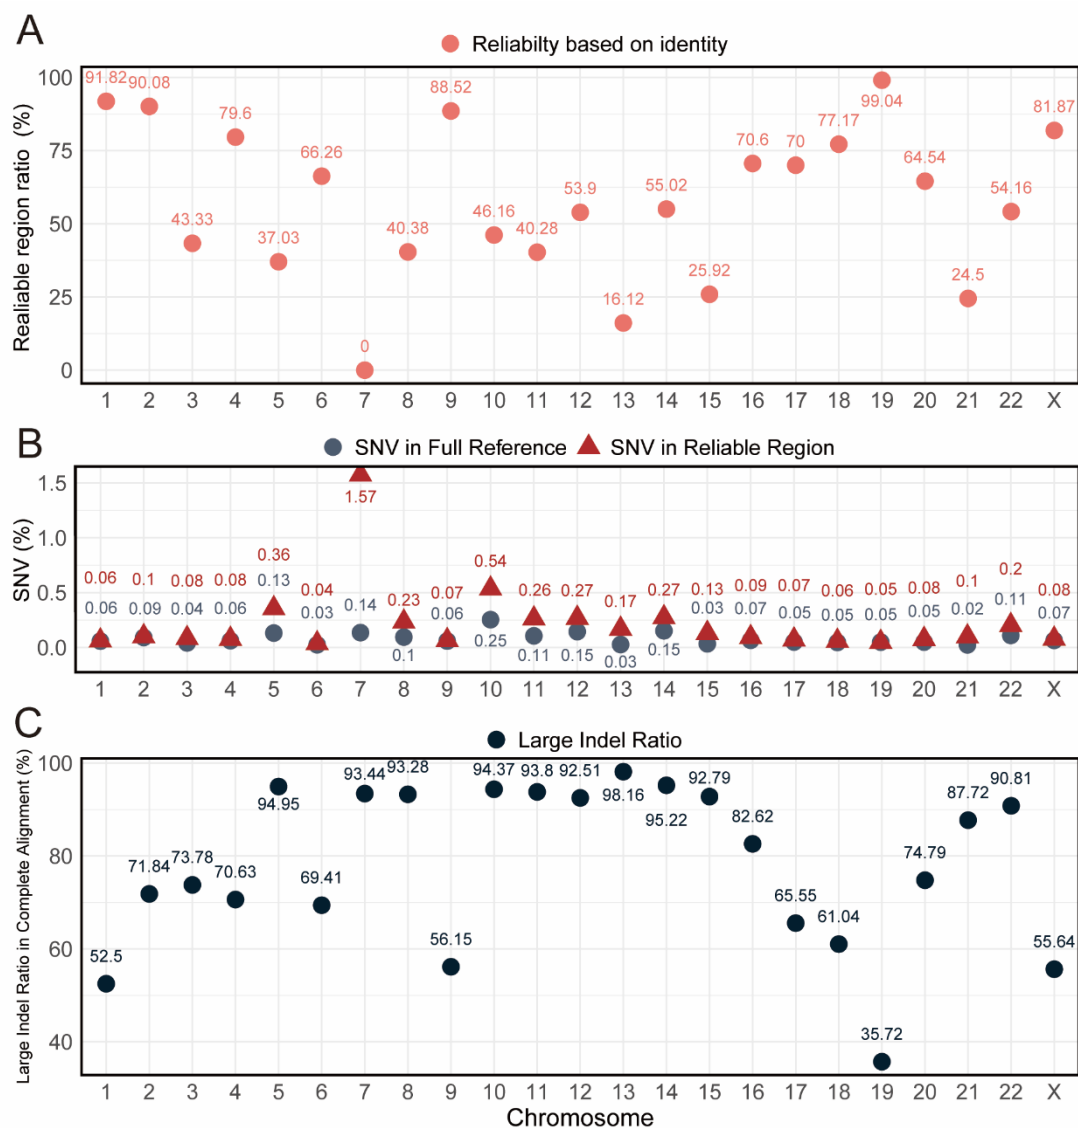

**Fig S4** Statistical analysis of centromere alignment results between CHM1 and CHM13 using UniAligner. (A) Proportion of identity-based reliable regions across different chromosomes relative to the reference sequence length. (B) Comparison of the single nucleotide variant (SNV) rates between the entire reference sequence region and identity-based reliable regions. (C) Proportion of large indels across the complete reference sequence region.

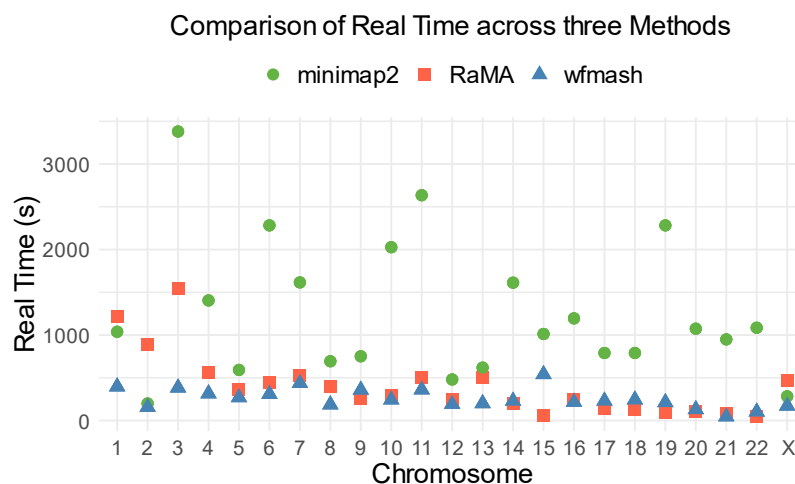

**Fig S5 Comparison of runtime across three sequence alignment methods on different chromosomes.** This figure shows the real runtime of three pairwise sequence alignment methods—RaMA, minimap2, and wfmash with 32 threads —on different chromosomes from CHM13 and CHM1 genomes. Each method is represented by different colors and shapes: green circles for RaMA, red squares for minimap2, and blue triangles for wfmash. The y-axis represents the runtime in seconds, while the x-axis shows the chromosome numbers. It can be observed that RaMA exhibits higher runtimes on several chromosomes, especially on larger ones like chr1 and chr3, while minimap2 and wfmash have relatively shorter runtimes, with wfmash being particularly fast on smaller chromosomes.

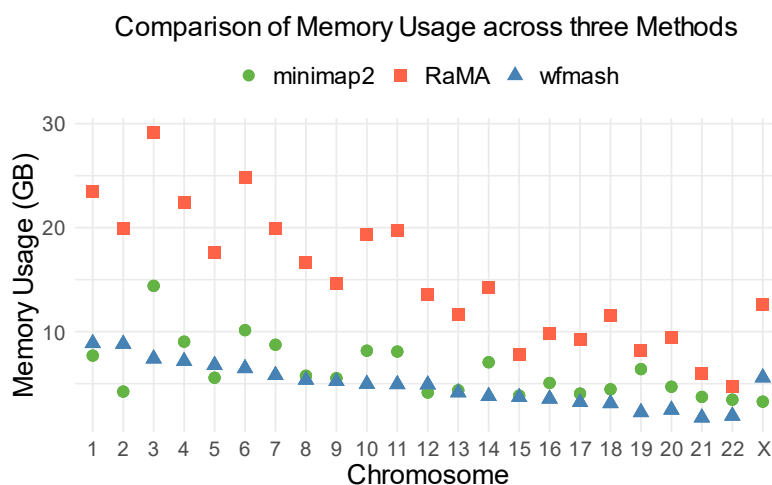

**Fig S6 Comparison of memory usage across three sequence alignment methods on different chromosomes.** This figure shows the memory usage of three pairwise sequence alignment methods with 32 threads—RaMA, minimap2, and wfmash—on different chromosomes from CHM13 and CHM1 genomes. Each method is represented by different colors and shapes: green circles for RaMA, red squares for minimap2, and blue triangles for wfmash. The y-axis represents the memory usage in gigabytes (GB), while the x-axis shows the chromosome numbers. It can be observed that RaMA generally consumes more memory on most chromosomes, while minimap2 and wfmash show lower memory usage, with wfmash being the most memory-efficient method across most chromosomes.



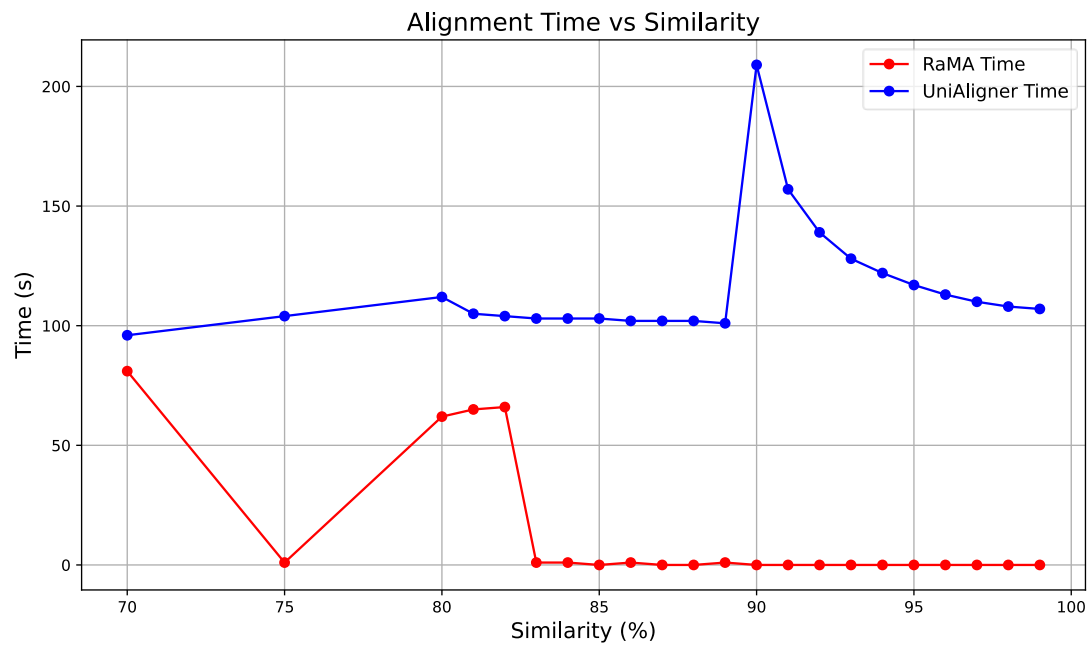

**Fig S7 Alignment Time of RaMA and UniAligner on Datasets with Different Similarities**

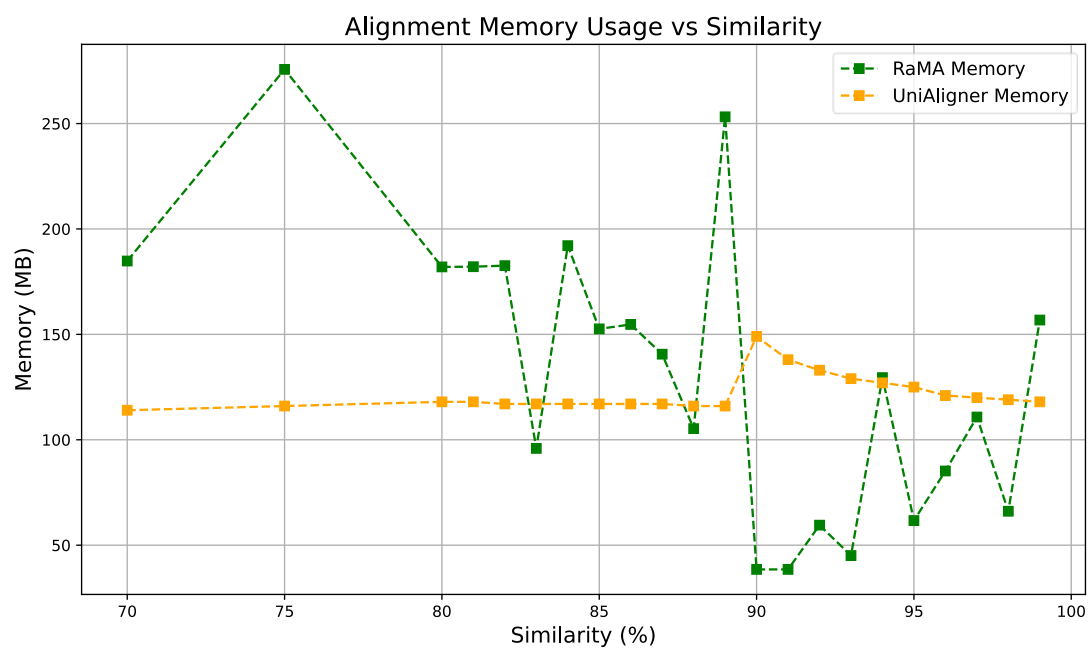

**Fig S8 Alignment Max Memory of RaMA and UniAligner on Datasets with Different Similarities**

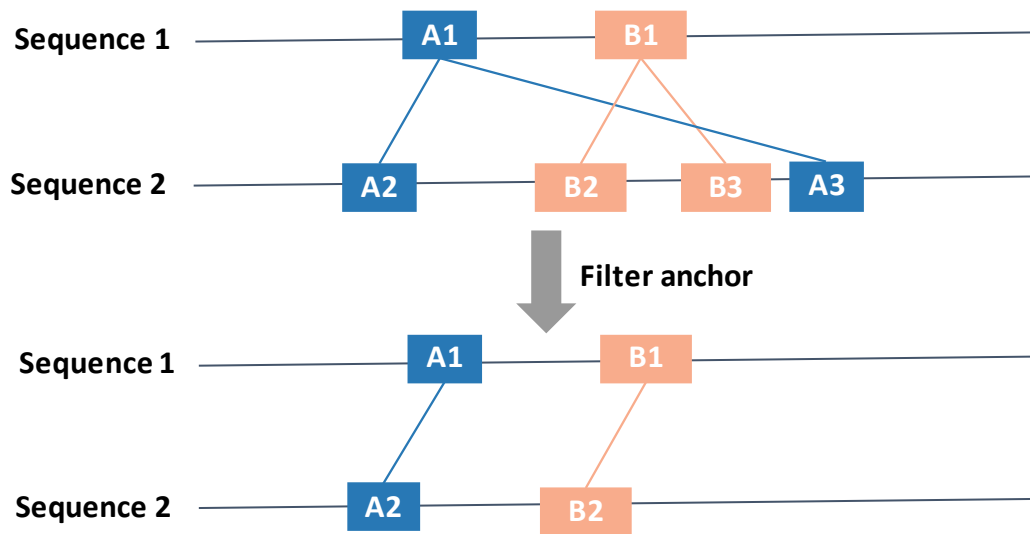

**Fig S9 Anchor Filtering:** Initially, the sequence contains two types of rare matches: A and B, each with three matches, resulting in four pairs of anchors: A1A2, A1A3, B1B2 and B1B3. Following dynamic programming, only A1A2 and B1B2 are saved. A1A3 were removed because they did not meet the requirement for colinearity, and B1B3 were removed due to their excessive gap cost.

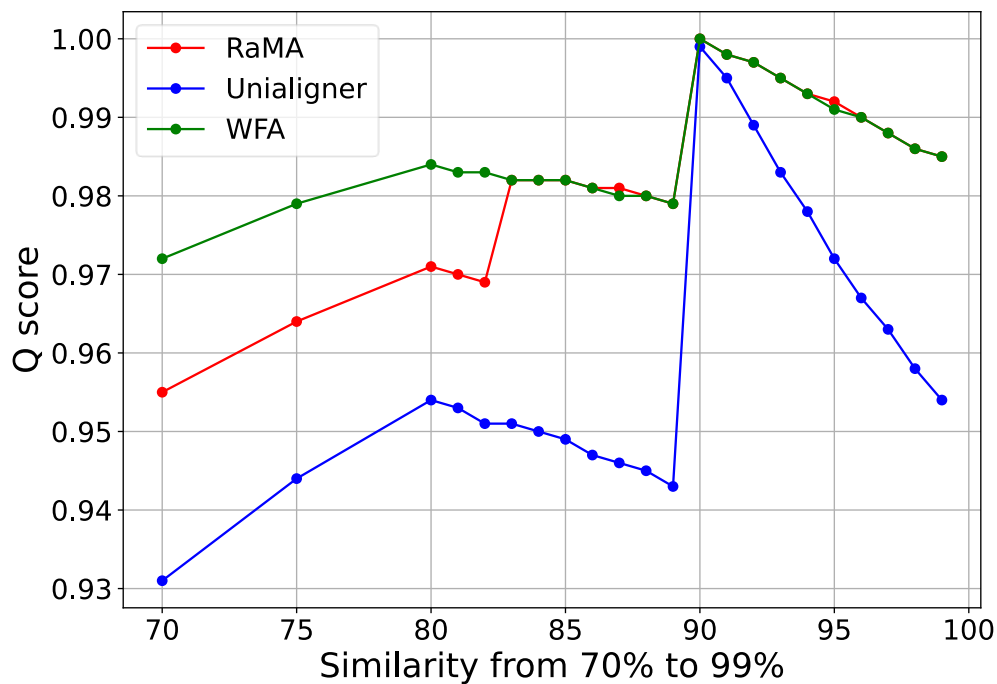

**Fig S10 Q-score comparison of alignment results for simulated non-repetitive sequences with different similarities using RaMA, UniAligner and WFA.**

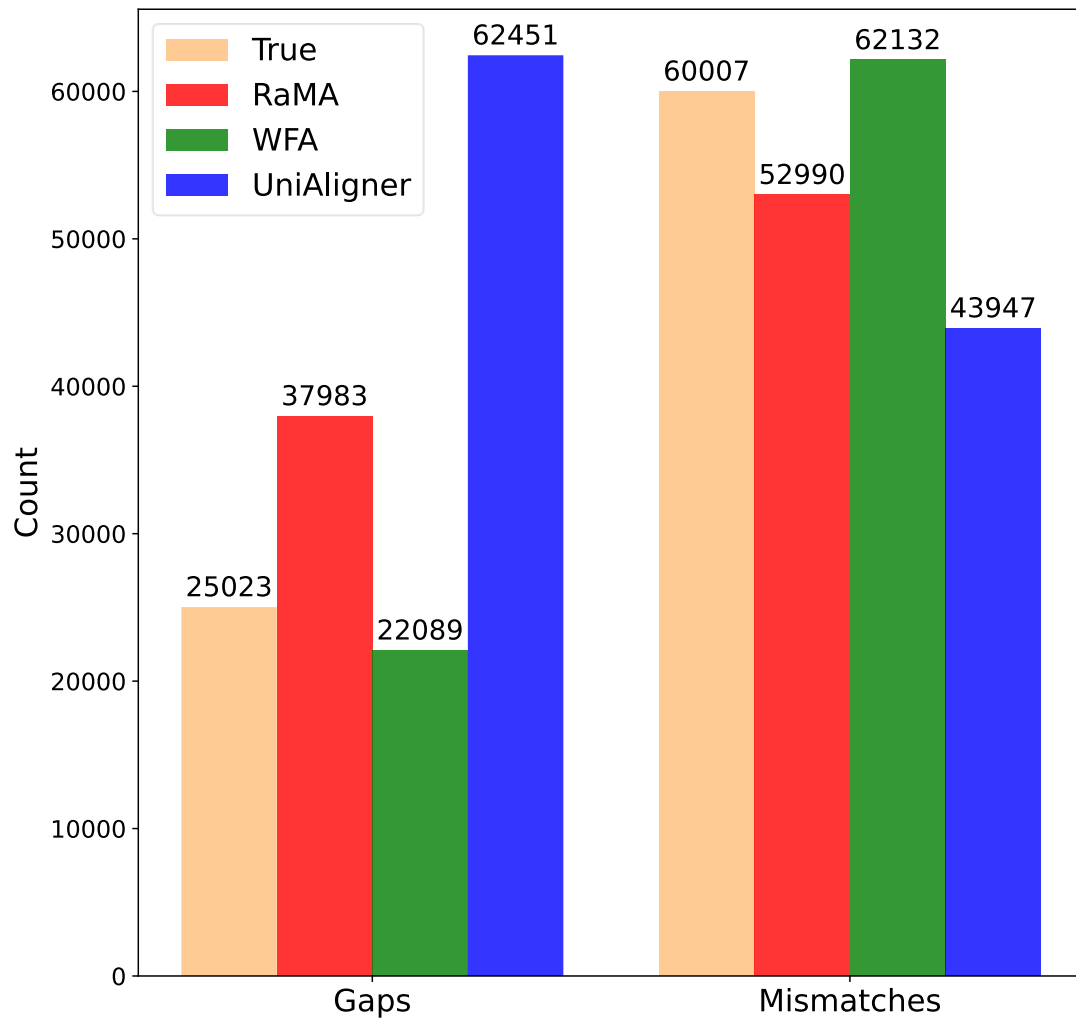

**Fig S11 Statistical analysis of bases count for gaps and mismatches in alignment results for sequences with 80% similarity using three methods.**

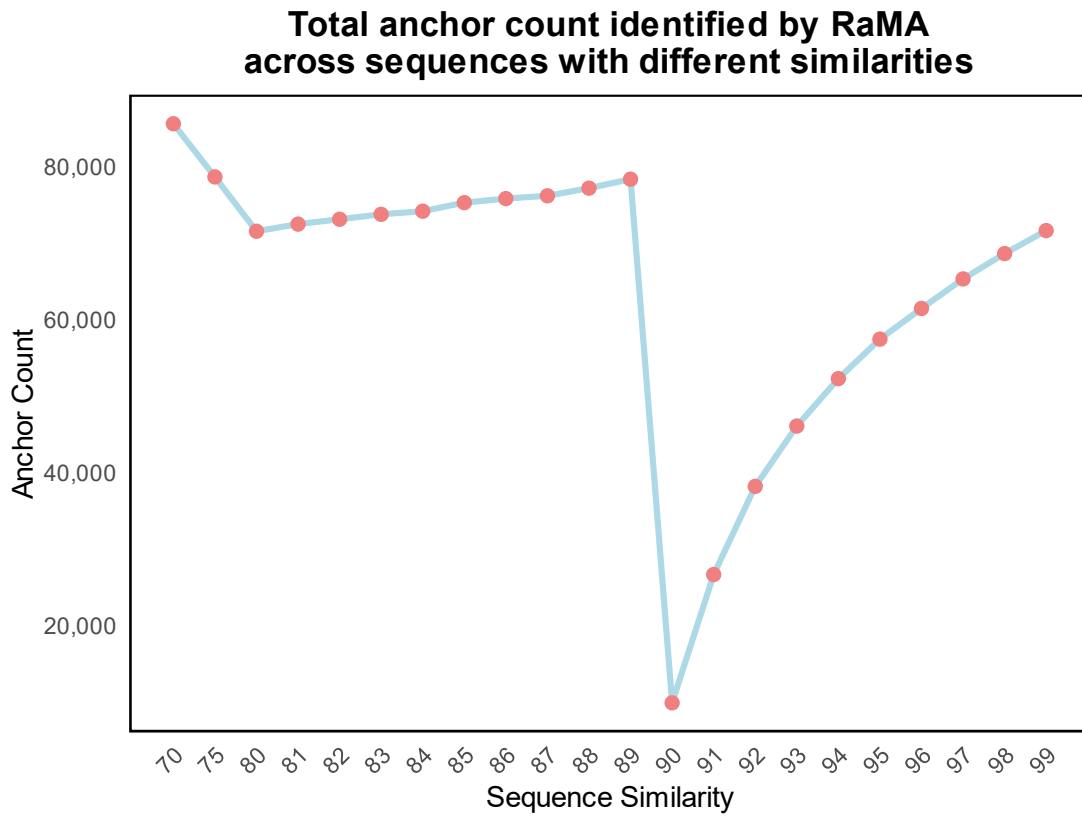

**Fig S12** Number of rare match anchors identified by RaMA for non-repetitive sequences at different similarity levels

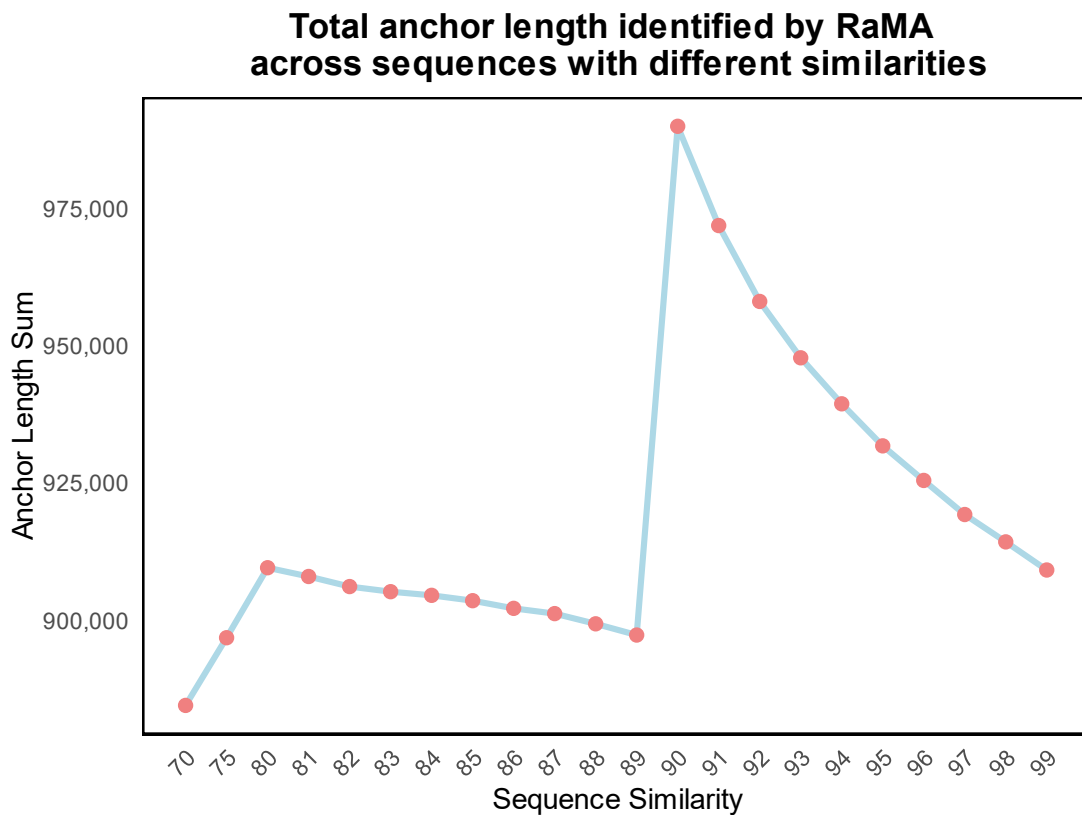

**Fig S13** Total length of rare match anchors identified by RaMA in 1-million-length non-repetitive sequences at different similarity levels.

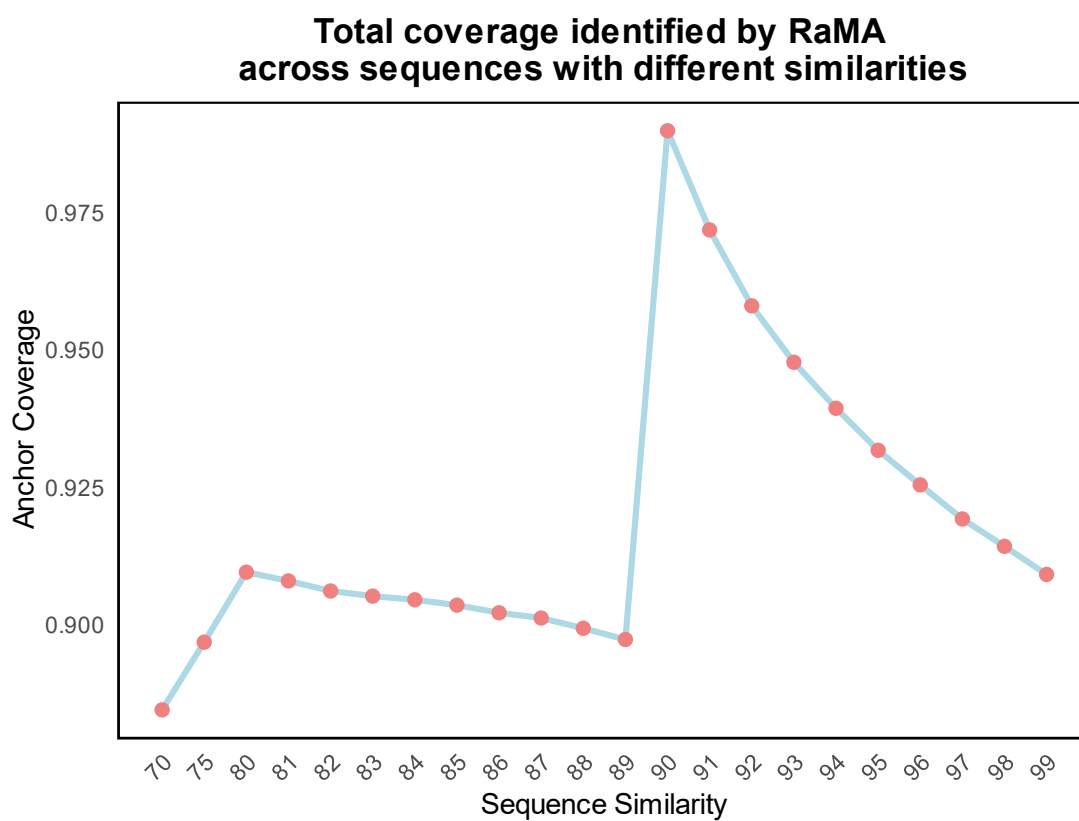

**Fig S14 Coverage of rare match anchors identified by RaMA in 1-million-length non-repetitive sequences at different similarity levels. Coverage is defined as the ratio of the total length of rare match anchors to the total sequence length.**

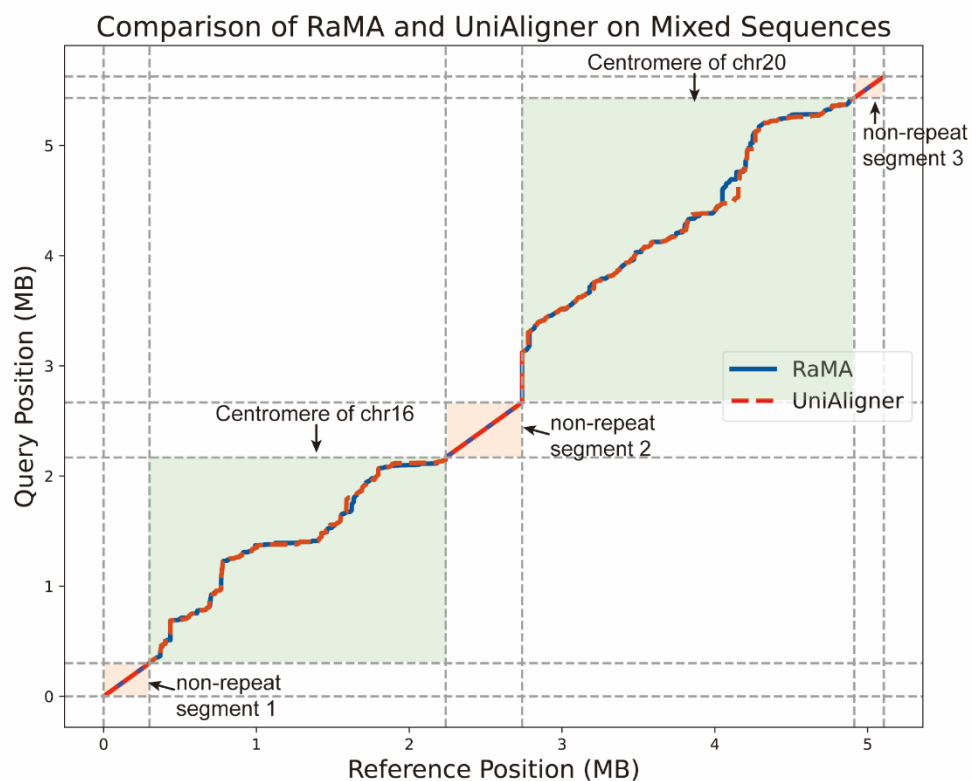

**Fig S15 Comparison of alignment paths between RaMA and UniAligner on hybrid sequences composed of tandem repeat and non-tandem repeat regions. We simulated two non-repetitive sequences of length 1,000,000 with 95% similarity, then inserted the centromeres from chromosomes 16 and 20 of CHM13 and CHM1 into them. This figure demonstrates that both RaMA and UniAligner have the ability to distinguish the boundaries of different regions.**

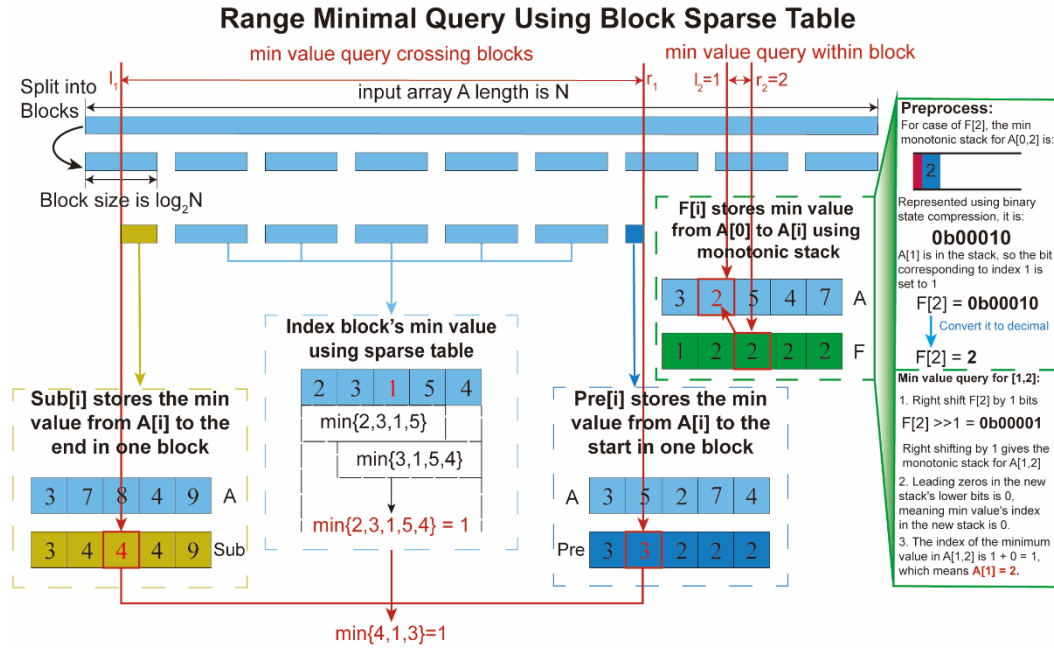

**Fig S16 Workflow of the Range Minimal Query algorithm using Block Sparse Table.** The input array  $A[1...N]$  is divided into blocks of length  $\log_2 N$ , with each block's maximum value precomputed, and inter-block minimal values handled by sparse table. For range minimum queries across blocks, it compares the edge parts with the full blocks in between. The sparse table quickly provides the minimum for the full blocks in the middle. For the incomplete head and tail blocks, we precompute the Pre and Sub arrays. Pre[i] stores the minimum from  $A[0]$  to the block's start, with Sub following the same logic, allowing the minimum value of the incomplete blocks to be obtained with a single query. For query within block, we precompute an F array, where  $F[i]$  stores the minimum value from  $A[0]$  to  $A[i]$  using a monotonic stack. The monotonic stack is compressed into a single integer, and bitwise operations allow us to retrieve the stack for different ranges to obtain the minimum value within that range. A detailed example of an intra-block query can be seen in the green box on the right side of the figure.

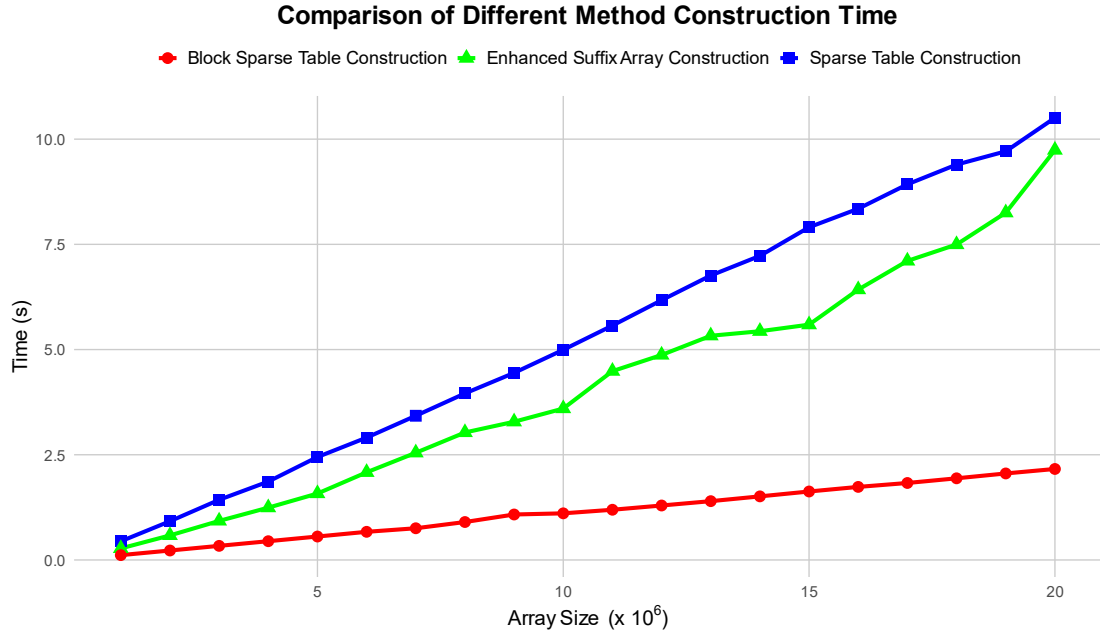

**Fig S17 Comparison of construction time for Block sparse Table, Regular Sparse Table, and Enhanced Suffix Array across different array sizes, averaged over ten experiments.**

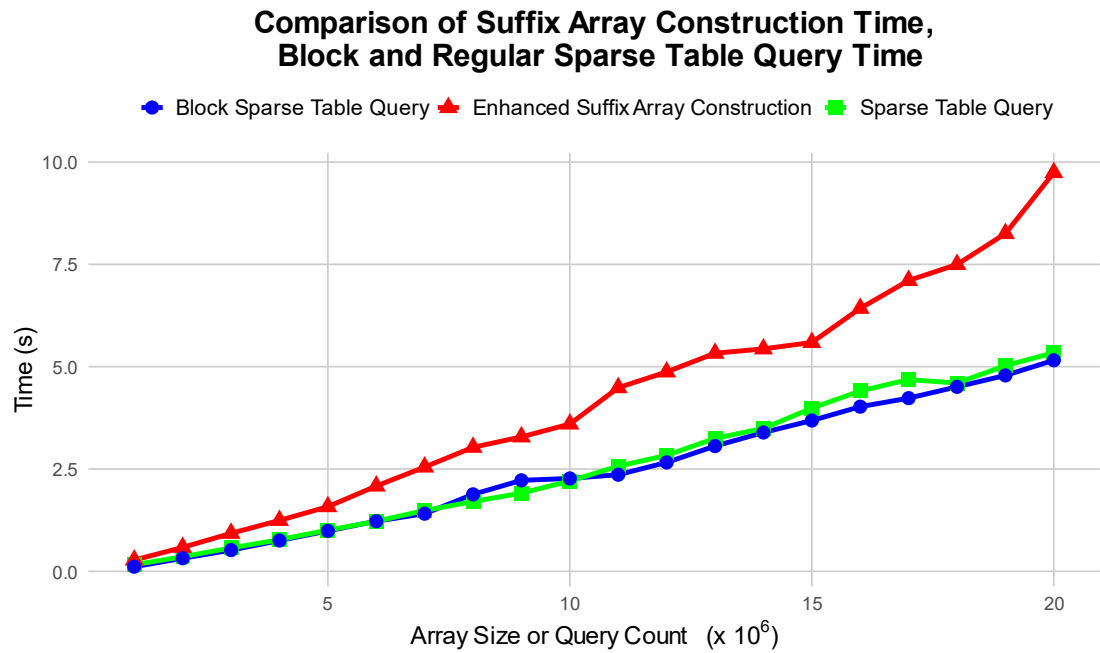

**Fig S18 Comparison of construction time for Suffix Array and query times for Regular Sparse Table and Block sparse Table across different array sizes or query counts, averaged over ten experiments.**



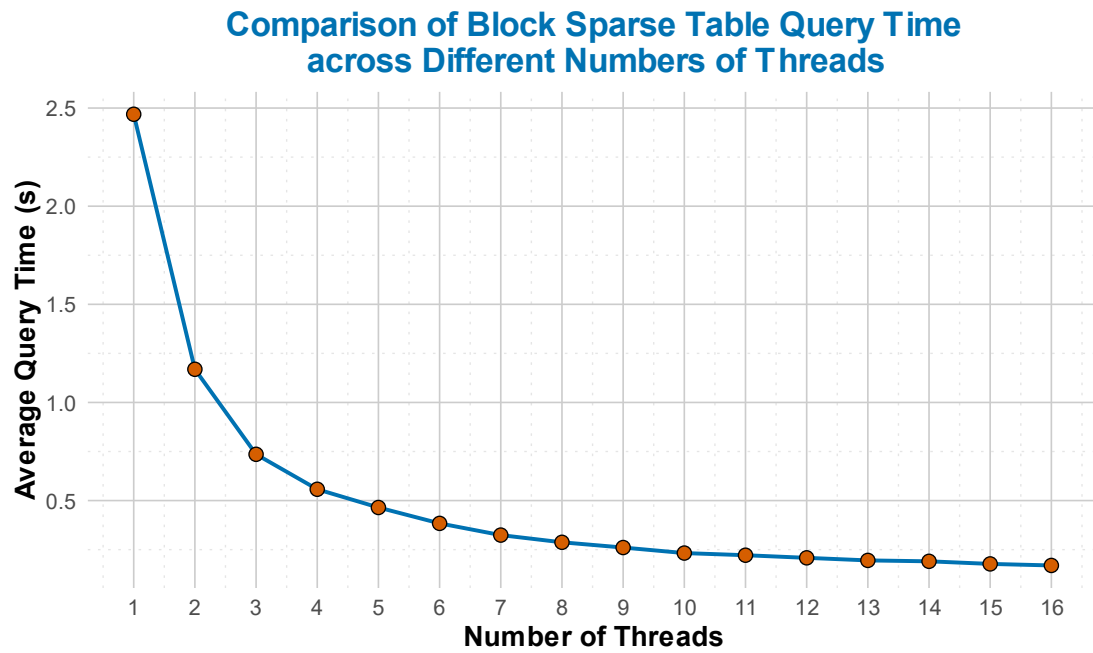

Fig S19 Variation in parallel query time for the Block sparse Table with respect to the number of threads, for N=1,000,000 queries, averaged over ten experiments.

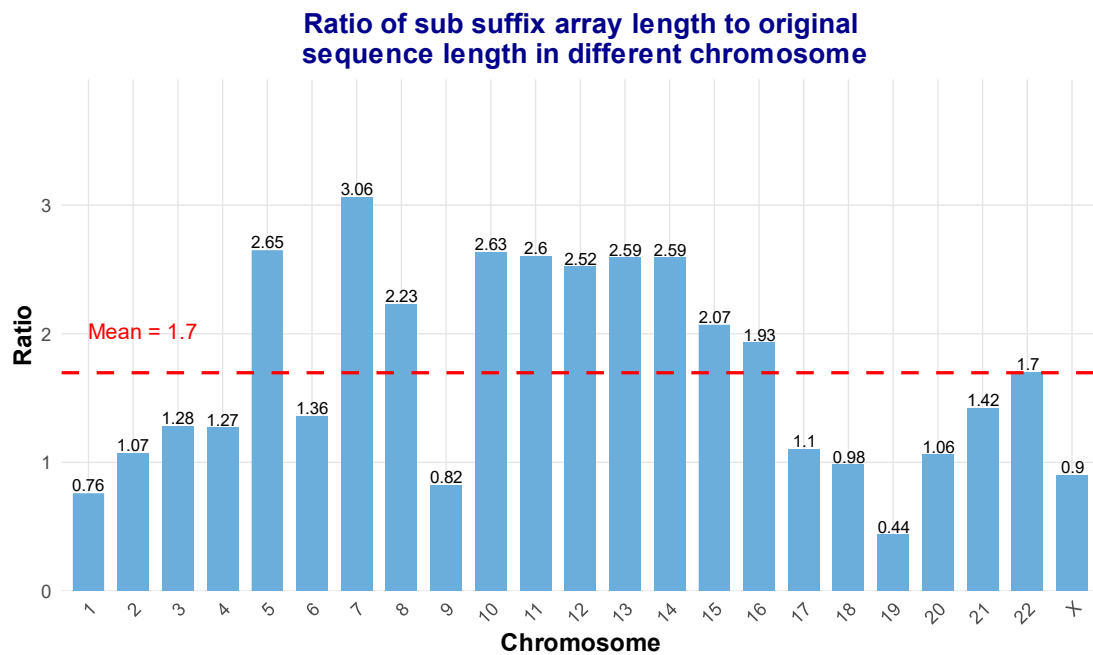

Fig S20 Ratio of sub suffix array length to the original sequence length across different chromosomes, based on the alignment results of CHM13 and CHM1 centromeres using RaMA.

## Comparison of the execution time of three strategies in RaMA

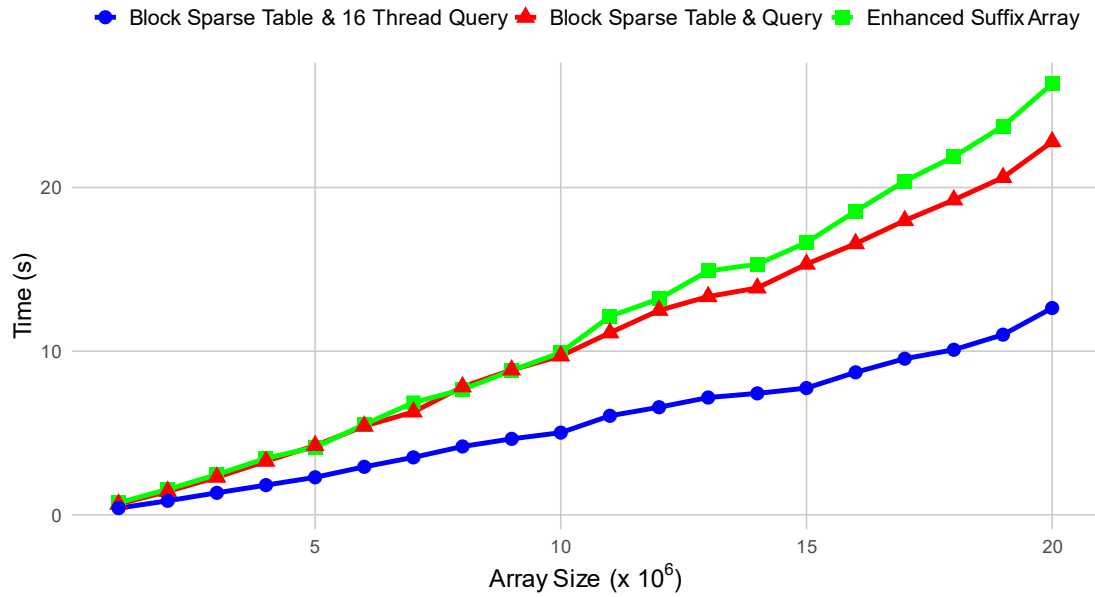

**Fig S21** Time comparison of three RaMA strategies across different array sizes averaged over ten experiments. For input data size  $N$ , all three strategies require constructing an enhanced suffix array for a sequence of length  $N$ . For subsequent steps, an enhanced suffix array needs to be constructed for a sub-sequence of length  $1.7N$ . The three strategies differ in their approach: (1) Strategy 1 directly constructs the suffix array for the sub-sequence. (2) Strategy 2 constructs the Block sparse Table for the input data of size  $N$  and performs  $1.7N$  queries. (3) Strategy 3 is the same as Strategy 2, but uses 16 threads for parallel querying.

## Supplemental Tables

**Table S1** Indel Statistics for RaMA Alignment Results of HOR Arrays Across Chromosomes in CHM13 and CHM1

| Chromosome | Total Indels | Insertions | Deletions | Short Indels | Long Indels | Short Insertions | Short Deletions | Long Insertions | Long Deletions | Total Short Indel Length |
|------------|--------------|------------|-----------|--------------|-------------|------------------|-----------------|-----------------|----------------|--------------------------|
| chr1       | 787          | 364        | 423       | 162          | 625         | 73               | 89              | 291             | 334            | 278                      |
| chr2       | 571          | 288        | 283       | 163          | 408         | 82               | 81              | 206             | 202            | 289                      |
| chr3       | 8802         | 4630       | 4172      | 6827         | 1975        | 3592             | 3235            | 1038            | 937            | 13173                    |
| chr4       | 648          | 286        | 362       | 115          | 533         | 55               | 60              | 231             | 302            | 179                      |
| chr5       | 2593         | 1423       | 1170      | 899          | 1694        | 477              | 422             | 946             | 748            | 1560                     |
| chr6       | 324          | 175        | 149       | 62           | 262         | 33               | 29              | 142             | 120            | 112                      |

|       |       |       |       |       |       |      |      |      |      |           |
|-------|-------|-------|-------|-------|-------|------|------|------|------|-----------|
| chr7  | 33529 | 17035 | 16494 | 16984 | 16545 | 8364 | 8620 | 8671 | 7874 | 3830<br>2 |
| chr8  | 1274  | 684   | 590   | 505   | 769   | 263  | 242  | 421  | 348  | 982       |
| chr9  | 405   | 199   | 206   | 75    | 330   | 36   | 39   | 163  | 167  | 124       |
| chr10 | 1955  | 1119  | 836   | 831   | 1124  | 477  | 354  | 642  | 482  | 1502      |
| chr11 | 2421  | 1377  | 1044  | 494   | 1927  | 237  | 257  | 1140 | 787  | 785       |
| chr12 | 2193  | 1095  | 1098  | 790   | 1403  | 424  | 366  | 671  | 732  | 1403      |
| chr13 | 347   | 177   | 170   | 73    | 274   | 38   | 35   | 139  | 135  | 131       |
| chr14 | 598   | 287   | 311   | 130   | 468   | 69   | 61   | 218  | 250  | 241       |
| chr15 | 256   | 168   | 88    | 47    | 209   | 27   | 20   | 141  | 68   | 75        |
| chr16 | 533   | 274   | 259   | 113   | 420   | 67   | 46   | 207  | 213  | 221       |
| chr17 | 594   | 309   | 285   | 78    | 516   | 37   | 41   | 272  | 244  | 119       |
| chr18 | 934   | 486   | 448   | 185   | 749   | 93   | 92   | 393  | 356  | 302       |
| chr19 | 635   | 301   | 334   | 109   | 526   | 53   | 56   | 248  | 278  | 169       |
| chr20 | 373   | 198   | 175   | 65    | 308   | 35   | 30   | 163  | 145  | 106       |
| chr21 | 103   | 45    | 58    | 16    | 87    | 7    | 9    | 38   | 49   | 29        |
| chr22 | 678   | 292   | 386   | 184   | 494   | 97   | 87   | 195  | 299  | 324       |
| chrX  | 530   | 314   | 216   | 124   | 406   | 65   | 59   | 249  | 157  | 195       |

**Table S2 Indel Statistics for RaMA Alignment Results of HOR Arrays Across Chromosomes in CHM13 and CHM1**

| Chromosome | Total Indels | Insertions | Deletions | Short Indels | Long Indels | Short Insertions | Short Deletions | Long Insertions | Long Deletions | Total Short Indel Length |
|------------|--------------|------------|-----------|--------------|-------------|------------------|-----------------|-----------------|----------------|--------------------------|
| chr1       | 1154         | 545        | 609       | 344          | 810         | 167              | 177             | 378             | 432            | 613                      |
| chr2       | 745          | 371        | 374       | 278          | 467         | 146              | 132             | 225             | 242            | 446                      |
| chr3       | 11208        | 5770       | 5438      | 5996         | 5212        | 3018             | 2978            | 2752            | 2460           | 12327                    |
| chr4       | 1108         | 536        | 572       | 359          | 749         | 192              | 167             | 344             | 405            | 660                      |
| chr5       | 4819         | 2487       | 2332      | 2409         | 2410        | 1164             | 1245            | 1323            | 1087           | 4359                     |
| chr6       | 481          | 234        | 247       | 147          | 334         | 76               | 71              | 158             | 176            | 280                      |

|       |            |       |       |       |       |       |       |       |       |            |
|-------|------------|-------|-------|-------|-------|-------|-------|-------|-------|------------|
| chr7  | 1138<br>07 | 58563 | 55244 | 64723 | 49084 | 31270 | 33453 | 27293 | 21791 | 13531<br>1 |
| chr8  | 2665       | 1332  | 1333  | 1174  | 1491  | 589   | 585   | 743   | 748   | 2250       |
| chr9  | 582        | 281   | 301   | 195   | 387   | 92    | 103   | 189   | 198   | 321        |
| chr10 | 7027       | 3658  | 3369  | 3712  | 3315  | 1964  | 1748  | 1694  | 1621  | 6839       |
| chr11 | 5206       | 2793  | 2413  | 1878  | 3328  | 887   | 991   | 1906  | 1422  | 3506       |
| chr12 | 4179       | 2093  | 2086  | 1905  | 2274  | 993   | 912   | 1100  | 1174  | 3659       |
| chr13 | 866        | 487   | 379   | 383   | 483   | 194   | 189   | 293   | 190   | 751        |
| chr14 | 2272       | 1085  | 1187  | 1063  | 1209  | 536   | 527   | 549   | 660   | 2013       |
| chr15 | 520        | 271   | 249   | 198   | 322   | 105   | 93    | 166   | 156   | 316        |
| chr16 | 791        | 375   | 416   | 224   | 567   | 115   | 109   | 260   | 307   | 387        |
| chr17 | 1020       | 525   | 495   | 300   | 720   | 157   | 143   | 368   | 352   | 489        |
| chr18 | 1183       | 603   | 580   | 359   | 824   | 177   | 182   | 426   | 398   | 537        |
| chr19 | 881        | 438   | 443   | 264   | 617   | 129   | 135   | 309   | 308   | 432        |
| chr20 | 634        | 306   | 328   | 209   | 425   | 102   | 107   | 204   | 221   | 363        |
| chr21 | 223        | 107   | 116   | 90    | 133   | 48    | 42    | 59    | 74    | 179        |
| chr22 | 1190       | 599   | 591   | 512   | 678   | 262   | 250   | 337   | 341   | 902        |
| chrX  | 879        | 466   | 413   | 315   | 564   | 153   | 162   | 313   | 251   | 578        |

**Table S3 Coordinates of centromeres on each chromosome in CHM13 assembly v2.0**

| Chromosome | Centromere Start | Centromere End |
|------------|------------------|----------------|
| chr1       | 121796048        | 126300487      |
| chr2       | 92333543         | 94673023       |
| chr3       | 91738002         | 96415026       |
| chr4       | 49705154         | 55199795       |
| chr5       | 47039134         | 49596625       |
| chr6       | 58286706         | 61058390       |
| chr7       | 60414372         | 63714499       |
| chr8       | 44215832         | 46325080       |
| chr9       | 44951775         | 47582595       |

|       |          |          |
|-------|----------|----------|
| chr10 | 39633793 | 41664589 |
| chr11 | 51061948 | 54413484 |
| chr12 | 34620838 | 37202490 |
| chr13 | 15547593 | 17498291 |
| chr14 | 10092112 | 12708411 |
| chr15 | 16678794 | 17694466 |
| chr16 | 35854528 | 37793352 |
| chr17 | 23892419 | 27486939 |
| chr18 | 15971633 | 20740248 |
| chr19 | 25832447 | 29749519 |
| chr20 | 26925852 | 29099655 |
| chr21 | 10962853 | 11303831 |
| chr22 | 12788180 | 15711065 |
| chrX  | 57819763 | 60927195 |

**Table S4 Coordinates of centromeres on each chromosome in CHM1 assembly v1.0**

| Chromosome | Centromere Start | Centromere End |
|------------|------------------|----------------|
| chr1       | 69846251         | 74163648       |
| chr2       | 2280725          | 3823209        |
| chr3       | 90996577         | 98681590       |
| chr4       | 49812514         | 54001726       |
| chr5       | 29395586         | 32818667       |
| chr6       | 58497481         | 61307082       |
| chr7       | 58944638         | 62985385       |
| chr8       | 41216354         | 44037473       |
| chr9       | 45051953         | 47583457       |
| chr10      | 39520501         | 41948392       |
| chr11      | 50937313         | 56228467       |
| chr12      | 34592723         | 37694387       |
| chr13      | 6192909          | 8741416        |

|       |          |          |
|-------|----------|----------|
| chr14 | 5595461  | 7351743  |
| chr15 | 6497612  | 8371049  |
| chr16 | 35822802 | 37690820 |
| chr17 | 23728691 | 28020815 |
| chr18 | 16002565 | 21365394 |
| chr19 | 25770284 | 29452617 |
| chr20 | 26344814 | 29108504 |
| chr21 | 5735844  | 6964260  |
| chr22 | 6404040  | 8403387  |
| chrX  | 9013916  | 12333297 |

**Table S5 Coordinates of centromeres on each chromosome in HG002 assembly v1.0 for maternal and paternal**

| Chromosome     | Centromere Start | Centromere End |
|----------------|------------------|----------------|
| chr1_MATERNAL  | 122027438        | 125955688      |
| chr2_MATERNAL  | 92151246         | 94103074       |
| chr3_MATERNAL  | 91302525         | 96202269       |
| chr4_MATERNAL  | 50067869         | 53484024       |
| chr5_MATERNAL  | 46798262         | 50386372       |
| chr6_MATERNAL  | 58406826         | 63810043       |
| chr7_MATERNAL  | 60365620         | 63823418       |
| chr8_MATERNAL  | 43874099         | 46711122       |
| chr9_MATERNAL  | 45056210         | 47410738       |
| chr10_MATERNAL | 39744707         | 42316517       |
| chr11_MATERNAL | 50999815         | 54520890       |
| chr12_MATERNAL | 34645712         | 37413891       |
| chr13_MATERNAL | 15945009         | 17237358       |
| chr14_MATERNAL | 16333134         | 18227245       |
| chr15_MATERNAL | 17565932         | 18803961       |
| chr16_MATERNAL | 36084593         | 38030775       |

|                |           |           |
|----------------|-----------|-----------|
| chr17_MATERNAL | 23434616  | 26974283  |
| chr18_MATERNAL | 15892634  | 19438086  |
| chr19_MATERNAL | 25955163  | 29401419  |
| chr20_MATERNAL | 26800597  | 29114249  |
| chr21_MATERNAL | 12802086  | 13492624  |
| chr22_MATERNAL | 15170886  | 17537395  |
| chrX_MATERNAL  | 57866532  | 60979089  |
| chr1_PATERNAL  | 122098079 | 127818069 |
| chr2_PATERNAL  | 91976043  | 93860057  |
| chr3_PATERNAL  | 91752227  | 96708256  |
| chr4_PATERNAL  | 49905202  | 54056008  |
| chr5_PATERNAL  | 46811597  | 56296672  |
| chr6_PATERNAL  | 58484688  | 63416222  |
| chr7_PATERNAL  | 60475720  | 62980001  |
| chr8_PATERNAL  | 44141137  | 46832173  |
| chr9_PATERNAL  | 43149766  | 45356409  |
| chr10_PATERNAL | 39736349  | 42039460  |
| chr11_PATERNAL | 50977296  | 53400916  |
| chr12_PATERNAL | 34645797  | 37414611  |
| chr13_PATERNAL | 11766683  | 13098132  |
| chr14_PATERNAL | 14415236  | 16746986  |
| chr15_PATERNAL | 14196988  | 15332200  |
| chr16_PATERNAL | 34883482  | 37233542  |
| chr17_PATERNAL | 23369094  | 27776826  |
| chr18_PATERNAL | 15911083  | 21158049  |
| chr19_PATERNAL | 25478659  | 29550562  |
| chr20_PATERNAL | 27138158  | 29974389  |
| chr21_PATERNAL | 9212650   | 10459921  |
| chr22_PATERNAL | 11150940  | 13678387  |

|               |          |          |
|---------------|----------|----------|
| chrY_PATERNAL | 10561582 | 10878917 |
|---------------|----------|----------|

**Table S6 The positions and lengths of the five segments in the hybrid sequence.**

| Segment      | Seq1 Start index | Length in Seq1 | Seq2 Start index | Length in Seq2 |
|--------------|------------------|----------------|------------------|----------------|
| Segment 1    | 0                | 300000         | 0                | 299983         |
| Centromere 1 | 300000           | 1938824        | 299983           | 1868018        |
| Segment 2    | 2238824          | 500000         | 2168001          | 500035         |
| Centromere 2 | 2738824          | 2173803        | 2668036          | 2763690        |
| Segment 3    | 4912627          | 193870         | 5431726          | 193913         |

**Table S7 Statistics of total anchor length, anchor count, and coverage in RaMA alignment results for different chromosomes of CHM13 and CHM1. Coverage is defined as the ratio of the total anchor length to the total sequence length. This table summarizes the total length of anchors, the number of anchors, and the coverage across various chromosomes in CHM13 and CHM1.**

| Chromosome | Anchor Length Sum | Anchor Count | Coverage    |
|------------|-------------------|--------------|-------------|
| chr1       | 2839728           | 3146         | 0.630428784 |
| chr2       | 856477            | 1922         | 0.366097167 |
| chr3       | 2460704           | 3006         | 0.526126015 |
| chr4       | 2164858           | 2708         | 0.393994439 |
| chr5       | 252468            | 6248         | 0.098717063 |
| chr6       | 1231592           | 902          | 0.444347913 |
| chr7       | 99035             | 25362        | 0.030009451 |
| chr8       | 228398            | 3007         | 0.10828409  |
| chr9       | 1611356           | 1897         | 0.612491923 |
| chr10      | 91294             | 3811         | 0.044954786 |
| chr11      | 364467            | 5687         | 0.108746258 |
| chr12      | 269378            | 4928         | 0.104343265 |
| chr13      | 41923             | 537          | 0.021491282 |
| chr14      | 97974             | 1513         | 0.037447555 |
| chr15      | 153407            | 554          | 0.151039903 |
| chr16      | 515491            | 1283         | 0.265878182 |
| chr17      | 1937038           | 2423         | 0.538886416 |



|       |         |      |             |
|-------|---------|------|-------------|
| chr18 | 2823736 | 3304 | 0.592150132 |
| chr19 | 2999472 | 2451 | 0.765743392 |
| chr20 | 982130  | 1452 | 0.45180267  |
| chr21 | 162450  | 244  | 0.476423699 |
| chr22 | 378753  | 2431 | 0.129581903 |
| chrX  | 1979063 | 2526 | 0.63688055  |

**Table S8 The number of correct matches and the coverage of correct matches in the five regions of the hybrid sequence for RaMA and UniAligner. For a given region pair, the match bases refer to the number of bases in the query region that align to the reference in the alignment result. Coverage is defined as the ratio of match bases to the length of the reference.**

| Region<br>Start | Region<br>End | Region<br>Length | RaMA Matched<br>Bases | RaMA<br>Coverage | UniAligner<br>Matched Bases | UniAligner<br>Coverage |
|-----------------|---------------|------------------|-----------------------|------------------|-----------------------------|------------------------|
| 0               | 299999        | 300000           | 293885                | 0.979617         | 290206                      | 0.967353               |
| 300000          | 2238823       | 1938824          | 639272                | 0.329722         | 563272                      | 0.290523               |
| 223882<br>4     | 2738823       | 500000           | 482241                | 0.964482         | 473135                      | 0.94627                |
| 273882<br>4     | 4912626       | 2173803          | 1099443               | 0.505769         | 1004062                     | 0.461892               |
| 491262<br>7     | 5102181       | 189555           | 129310                | 0.682177         | 138254                      | 0.729361               |

## Reference

1. Li, H., *Minimap2: pairwise alignment for nucleotide sequences*. Bioinformatics, 2018. **34**(18): p. 3094-3100.
2. Marco-Sola, S., et al., *Fast gap-affine pairwise alignment using the wavefront algorithm*. Bioinformatics, 2021. **37**(4): p. 456-463.
3. Bzikadze, A.V. and P.A. Pevzner, *UniAligner: a parameter-free framework for fast sequence alignment*. Nature Methods, 2023. **20**(9): p. 1346-1354.
4. Logsdon, G.A., et al., *The variation and evolution of complete human centromeres*. Nature, 2024: p. 1-10.
5. Li, H., et al., *The sequence alignment/map format and SAMtools*. bioinformatics, 2009. **25**(16): p. 2078-2079.
6. Guarracino, A., et al. *wfmash: a pangenome-scale aligner*. 2021; Available from: <https://github.com/waveygang/wfmash>.
7. Kunyavskaya, O., et al., *Automated annotation of human centromeres with HORmon*. Genome Research, 2022. **32**(6): p. 1137-1151.

8. Fletcher, W. and Z. Yang, *INDELible: A Flexible Simulator of Biological Sequence Evolution*. Molecular Biology and Evolution, 2009. **26**(8): p. 1879-1888.
9. Bender, M.A. and M. Farach-Colton. *The LCA problem revisited*. in *LATIN 2000: Theoretical Informatics: 4th Latin American Symposium, Punta del Este, Uruguay, April 10-14, 2000 Proceedings 4*. 2000. Springer.
10. Louza, F.A., et al., *gsufsort: constructing suffix arrays, LCP arrays and BWTs for string collections*. Algorithms for Molecular Biology, 2020. **15**: p. 1-5.
