# Supplementary material for: Fast sequence alignment for centromeres with RaMA
Source: HighWire-hosted journal article supplement (doi:10.1101/gr.279763.124), 2025-02-12
Supplement: Supplemental_Table_S9.xlsx [file Supplemental_Table_S9.xlsx]

## Sheet: README
Table S9: Statistical analysis of alignment results for centromeric sequences of CHM1 and CHM13 using RaMA and UniAligner. The four tables present a statistical analysis of the alignment results for the centromeric sequences of CHM1 and CHM13, using the RaMA and UniAligner tools. Each table corresponds to different reference sequences and alignment tools, such as CHM13_ref_RaMA, which shows resul…

## Sheet: CHM13_ref_RaMA
chr	reference type	mean identity (%)	mean identity in reliable region (%)	standard deviation in reliable region	aligned reference bases	ref aligned (%)	aligned query bases	query aligned (%)	ref SNV (%)	ref SNV in reliable region (%)
1	chm13	99.8718	99.5036	0.0376769	4014439	89.12	2934935	67.98	0.0660682	0.0741324
2	chm13	99.734	99.267	0.0233762	1419480	60.68	882607	57.22	0.0759998	0.125257
3	chm13	97.3775	96.9014	0.105543	3330000	71.2	2693467	35.05	1.40675	0.15015
4	chm13	99.8526	99.7719	0.00848005	3364641	61.23	2282265	54.48	0.0494482	0.0807516
5	chm13	96.8539	95.3401	0.0857624	1327491	51.91	405856	11.86	0.407861	0.746973
6	chm13	99.9067	99.0174	0.0719819	1801684	65	1332317	47.42	0.0331928	0.0510633
7	chm13	63.4704	67.6008	0.066032	0	0	0	0	2.30094	0
8	chm13	97.8534	96.1888	0.0675947	990000	46.94	323706	11.47	0.285694	0.438182
9	chm13	99.8645	99.5747	0.0263377	2280820	86.7	1666069	65.81	0.0704343	0.0812427
10	chm13	95.1387	94.1869	0.0599668	930000	45.79	269369	11.09	0.577852	1.15258
11	chm13	98.0859	96.7804	0.0744644	2101536	62.7	614592	11.62	0.28017	0.446673
12	chm13	97.9413	95.9526	0.0774277	1701652	65.91	524759	16.92	0.335754	0.502159
13	chm13	98.5428	96.6666	0.0614024	650698	33.36	138422	5.43	0.085918	0.257416
14	chm13	97.7109	95.0393	0.0967831	936299	35.79	224778	12.8	0.18121	0.369967
15	chm13	99.5357	99.312	0.0176327	535672	52.74	232766	12.42	0.0813255	0.154199
16	chm13	99.5992	98.7935	0.0608469	1378824	71.12	645723	34.57	0.106095	0.149185
17	chm13	99.8526	99.3505	0.0536231	3094520	86.09	2164282	50.42	0.0722489	0.0839225
18	chm13	99.8619	99.6455	0.0246507	4188615	87.84	2964187	55.27	0.0663086	0.0754665
19	chm13	99.9027	99.8785	0.00310416	3657072	93.36	3038902	82.53	0.0592534	0.0634661
20	chm13	99.7543	99.7697	0.00498595	1723803	79.3	1091841	39.51	0.106311	0.134064
21	chm13	99.7625	99.7722	0.00187115	300978	88.27	189359	15.41	0.101766	0.115291
22	chm13	99.2051	96.8331	0.0774466	1162885	39.79	431851	21.6	0.0944615	0.236911
X	chm13	99.8476	99.7487	0.0113588	2657432	85.52	2083440	62.77	0.0851829	0.0996074

## Sheet: CHM1_ref_RaMA
chr	reference type	mean identity (%)	mean identity in reliable region (%)	standard deviation in reliable region	aligned reference bases	ref aligned (%)	aligned query bases	query aligned (%)	ref SNV (%)	ref SNV in reliable region (%)
1	chm1	99.8718	99.5036	0.0376769	4014439	92.98	2934935	65.16	0.0689304	0.0741324
2	chm1	99.734	99.267	0.0233762	1419480	92.03	882607	37.73	0.115269	0.125257
3	chm1	97.3775	96.9014	0.105543	3330000	43.33	2693467	57.59	0.856134	0.15015
4	chm1	99.8526	99.7719	0.00848005	3364641	80.32	2282265	41.54	0.0648571	0.0807516
5	chm1	96.8539	95.3401	0.0857624	1327491	38.78	405856	15.87	0.304725	0.746973
6	chm1	99.9067	99.0174	0.0719819	1801684	64.13	1332317	48.07	0.0327449	0.0510633
7	chm1	63.4704	67.6008	0.066032	0	0	0	0	1.87921	0
8	chm1	97.8534	96.1888	0.0675947	990000	35.09	323706	15.35	0.213603	0.438182
9	chm1	99.8645	99.5747	0.0263377	2280820	90.1	1666069	63.33	0.0731976	0.0812427
10	chm1	95.1387	94.1869	0.0599668	930000	38.3	269369	13.26	0.483341	1.15258
11	chm1	98.0859	96.7804	0.0744644	2101536	39.72	614592	18.34	0.177466	0.446673
12	chm1	97.9413	95.9526	0.0774277	1701652	54.86	524759	20.33	0.279463	0.502159
13	chm1	98.5428	96.6666	0.0614024	650698	25.53	138422	7.1	0.065764	0.257416
14	chm1	97.7109	95.0393	0.0967831	936299	53.31	224778	8.59	0.269945	0.369967
15	chm1	99.5357	99.312	0.0176327	535672	28.59	232766	22.92	0.0440901	0.154199
16	chm1	99.5992	98.7935	0.0608469	1378824	73.81	645723	33.3	0.110117	0.149185
17	chm1	99.8526	99.3505	0.0536231	3094520	72.1	2164282	60.21	0.0605062	0.0839225
18	chm1	99.8619	99.6455	0.0246507	4188615	78.1	2964187	62.16	0.0589614	0.0754665
19	chm1	99.9027	99.8785	0.00310416	3657072	99.31	3038902	77.58	0.0630307	0.0634661
20	chm1	99.7543	99.7697	0.00498595	1723803	62.37	1091841	50.23	0.0836201	0.134064
21	chm1	99.7625	99.7722	0.00187115	300978	24.5	189359	55.53	0.0282478	0.115291
22	chm1	99.2051	96.8331	0.0774466	1162885	58.16	431851	14.77	0.138095	0.236911
X	chm1	99.8476	99.7487	0.0113588	2657432	80.06	2083440	67.05	0.0797438	0.0996074

## Sheet: CHM13_ref_UniAligner
chr	reference type	mean identity (%)	mean identity in reliable region (%)	standard deviation in reliable region	aligned reference bases	ref aligned (%)	aligned query bases	query aligned (%)	ref SNV (%)	ref SNV in reliable region (%)
1	chm13	99.8762	99.6999	0.0190446	3964439	88.01	2840448	65.79	0.055856	0.0634642
2	chm13	99.76	99.6539	0.00512287	1389480	59.39	852571	55.27	0.060569	0.101981
3	chm13	99.5514	98.3848	0.0494561	3330000	71.2	2533486	32.97	0.06889	0.0847748
4	chm13	99.839	99.6453	0.014417	3334641	60.69	2197919	52.47	0.0475008	0.0782693
5	chm13	97.0829	95.8109	0.0538627	1267491	49.56	283197	8.27	0.176892	0.356926
6	chm13	99.915	99.7415	0.0207645	1861684	67.17	1307239	46.53	0.0257966	0.0384061
7	chm13	78.414	82.0017	0.0317573	127	0	112	0	0.166357	1.5748
8	chm13	98.4526	96.1428	0.0617606	1139248	54.01	308126	10.92	0.127249	0.23498
9	chm13	99.874	99.8292	0.00357223	2240820	85.18	1573370	62.15	0.0567504	0.0666274
10	chm13	95.0907	92.9729	0.0734998	1120796	55.19	226850	9.34	0.303773	0.536226
11	chm13	98.0462	97.4806	0.036792	2131536	63.6	500985	9.47	0.167953	0.264082
12	chm13	98.0025	96.3018	0.0597814	1671652	64.75	392171	12.64	0.174346	0.268956
13	chm13	98.3403	95.924	0.0743062	410698	21.05	80716	3.17	0.0358333	0.170198
14	chm13	97.7498	95.7042	0.0651867	966299	36.93	196150	11.17	0.10232	0.27476
15	chm13	99.4531	99.4456	0.00613903	485672	47.82	193946	10.35	0.0632094	0.132188
16	chm13	99.6676	98.9934	0.0373063	1318824	68.02	563374	30.16	0.0638531	0.0938715
17	chm13	99.8498	99.81	0.0047458	3004520	83.59	2020470	47.07	0.060314	0.0721579
18	chm13	99.8773	99.8491	0.00342087	4138615	86.79	2840252	52.96	0.0523213	0.0602859
19	chm13	99.9135	99.9086	0.00156375	3647072	93.11	2973297	80.74	0.0464377	0.0498756
20	chm13	99.8062	99.6235	0.0211803	1783803	82.06	993738	35.96	0.0633912	0.0772507
21	chm13	99.7251	99.7262	0.00324235	300978	88.27	171514	13.96	0.0882755	0.100007
22	chm13	99.2312	98.0917	0.0423918	1082885	37.05	413416	20.68	0.0755418	0.2039
X	chm13	99.8525	99.7108	0.017412	2717432	87.45	1974627	59.49	0.0696395	0.079634

## Sheet: CHM1_ref_UniAligner
chr	reference type	mean identity (%)	mean identity in reliable region (%)	standard deviation in reliable region	aligned reference bases	ref aligned (%)	aligned query bases	query aligned (%)	ref SNV (%)	ref SNV in reliable region (%)
1	chm1	99.8762	99.6999	0.0190446	3964439	91.82	2840448	63.06	0.0582758	0.0634642
2	chm1	99.76	99.6539	0.00512287	1389480	90.08	852571	36.44	0.0918648	0.101981
3	chm1	99.5514	98.3848	0.0494561	3330000	43.33	2533486	54.17	0.0419258	0.0847748
4	chm1	99.839	99.6453	0.014417	3334641	79.6	2197919	40	0.0623029	0.0782693
5	chm1	97.0829	95.8109	0.0538627	1267491	37.03	283197	11.07	0.132162	0.356926
6	chm1	99.915	99.7415	0.0207645	1861684	66.26	1307239	47.16	0.0254485	0.0384061
7	chm1	78.414	82.0017	0.0317573	127	0	112	0	0.135866	1.5748
8	chm1	98.4526	96.1428	0.0617606	1139248	40.38	308126	14.61	0.0951396	0.23498
9	chm1	99.874	99.8292	0.00357223	2240820	88.52	1573370	59.81	0.0589768	0.0666274
10	chm1	95.0907	92.9729	0.0734998	1120796	46.16	226850	11.17	0.254089	0.536226
11	chm1	98.0462	97.4806	0.036792	2131536	40.28	500985	14.95	0.106385	0.264082
12	chm1	98.0025	96.3018	0.0597814	1671652	53.9	392171	15.19	0.145116	0.268956
13	chm1	98.3403	95.924	0.0743062	410698	16.12	80716	4.14	0.0274278	0.170198
14	chm1	97.7498	95.7042	0.0651867	966299	55.02	196150	7.5	0.152424	0.27476
15	chm1	99.4531	99.4456	0.00613903	485672	25.92	193946	19.1	0.0342686	0.132188
16	chm1	99.6676	98.9934	0.0373063	1318824	70.6	563374	29.06	0.0662734	0.0938715
17	chm1	99.8498	99.81	0.0047458	3004520	70	2020470	56.21	0.0505111	0.0721579
18	chm1	99.8773	99.8491	0.00342087	4138615	77.17	2840252	59.56	0.046524	0.0602859
19	chm1	99.9135	99.9086	0.00156375	3647072	99.04	2973297	75.91	0.049398	0.0498756
20	chm1	99.8062	99.6235	0.0211803	1783803	64.54	993738	45.71	0.0498609	0.0772507
21	chm1	99.7251	99.7262	0.00324235	300978	24.5	171514	50.3	0.0245031	0.100007
22	chm1	99.2312	98.0917	0.0423918	1082885	54.16	413416	14.14	0.110436	0.2039
X	chm1	99.8525	99.7108	0.017412	2717432	81.87	1974627	63.55	0.0651929	0.079634
