# Supplementary material for: Fast sequence alignment for centromeres with RaMA
Source: HighWire-hosted journal article supplement (doi:10.1101/gr.279763.124), 2025-02-12
Supplement: Supplemental_Table_S10.xlsx [file Supplemental_Table_S10.xlsx]

## Sheet: README
Table S10: Statistical analysis of indels in centromeric sequence alignment results for CHM1 and CHM13 using RaMA and UniAligner. Two tables provide a detailed analysis of large insertions and deletions (indels) identified in the centromeric sequences of CHM1 and CHM13, as aligned using the RaMA and UniAligner tools. The analysis includes metrics such as total alignment length, reliable region le…

## Sheet: RaMA_long_indel
chromosome	total length	reliable length	rare match length	reliable ratio (%)	rare match ratio (%)	large indel	large indel count	reliable large indel	reliable large indel count	large indel ratio (%)	reliable large indel ratio (%)
chr1	4504439	3839286	2839728	85.2334	63.0429	1569336	334	997123	256	34.8398	22.1365
chr2	2339480	2105813	856477	90.012	36.6097	1456712	202	1247881	138	62.2665	53.3401
chr3	4677024	3740328	2460704	79.9724	52.6126	1835046	937	1277420	204	39.2353	27.3127
chr4	5494641	4225176	2164858	76.8963	39.3994	3212274	302	2058205	217	58.4619	37.4584
chr5	2557491	829332	252468	32.4276	9.87171	2145331	748	572399	415	83.8842	22.3813
chr6	2771684	2391913	1231592	86.2982	44.4348	1439309	120	1159708	88	51.929	41.8413
chr7	3300127	806637	99035	24.4426	3.00095	3014568	7874	699271	3720	91.347	21.1892
chr8	2109248	745578	228398	35.348	10.8284	1769971	348	515034	195	83.9148	24.4179
chr9	2630820	2142388	1611356	81.4342	61.2492	964676	167	529500	120	36.6683	20.1268
chr10	2030796	461654	91294	22.7327	4.49548	1750441	482	367723	255	86.1948	18.1073
chr11	3351536	1439446	364467	42.9488	10.8746	2736490	787	1071278	459	81.6488	31.9638
chr12	2581652	1204143	269378	46.6423	10.4343	2055609	732	931340	429	79.6238	36.0754
chr13	1950698	153767	41923	7.88267	2.14913	1812158	135	111540	46	92.8979	5.71795
chr14	2616299	757411	97974	28.9497	3.74476	2383543	250	658394	120	91.1036	25.1651
chr15	1015672	550128	153407	54.1639	15.104	782858	68	396383	37	77.0778	39.0267
chr16	1938824	1104980	515491	56.9923	26.5878	1292996	213	588638	114	66.6897	30.3606
chr17	3594520	2876953	1937038	80.0372	53.8886	1430160	244	938076	164	39.7872	26.0974
chr18	4768615	4094664	2823736	85.8669	59.215	1804262	356	1268507	251	37.8362	26.6012
chr19	3917072	3590291	2999472	91.6575	76.5743	878088	278	588942	215	22.4169	15.0353
chr20	2173803	1513673	982130	69.6325	45.1803	1081909	145	530454	91	49.7703	24.4021
chr21	340978	237723	162450	69.718	47.6424	151602	49	75119	23	44.4609	22.0305
chr22	2922885	2297176	378753	78.5928	12.9582	2490798	299	1916538	200	85.2171	65.5701
chrX	3107432	2567641	1979063	82.629	63.6881	1023885	157	586519	116	32.9496	18.8747

## Sheet: UniAligner_long_indel
chromosome	total length	large indel	large indel count	large indel ratio (%)
chr1	5981377	3140305	810	52.5014
chr2	3029393	2176376	467	71.842
chr3	9803640	7232916	5212	73.7779
chr4	7485910	5287307	749	70.6301
chr5	5697286	5409641	2410	94.9512
chr6	4274041	2966517	334	69.4078
chr7	7015873	6555561	49084	93.439
chr8	4621969	4311321	1491	93.2789
chr9	3588954	2015263	387	56.1518
chr10	4227524	3989522	3315	94.3702
chr11	8141614	7637032	3328	93.8024
chr12	5290776	4894577	2274	92.5115
chr13	4418455	4336954	483	98.1554
chr14	4175115	3975636	1209	95.2222
chr15	2695163	2500901	322	92.7922
chr16	3243450	2679671	567	82.6179
chr17	5866174	3845215	720	65.5489
chr18	7291192	4450403	824	61.0381
chr19	4626108	1652379	617	35.7186
chr20	3943750	2949644	425	74.7929
chr21	1397880	1226187	133	87.7176
chr22	4508773	4094412	678	90.8099
chrX	4452181	2476971	564	55.635
